# Supplementary material for: Cytotoxic withanolides from Physalis angulata var. villosa and the apoptosis-inducing effect via ROS generation and the activation of MAPK in human osteosarcoma cells
Source: Royal Society of Chemistry journal article supplement (doi:10.1039/c6ra08574a), 2016-01-01
Supplement: c6ra08574a1.pdf [file c6ra08574a1.pdf]

**Cytotoxic withanolides from *Physalis angulata* var.  
*villosa* and the apoptosis-inducing effect via ROS  
generation and the activation of MAPK in human  
osteosarcoma cells**

Ting Ma, ‡ Wen-Na Zhang, ‡ Lei Yang, Chao Zhang, Ru Lin, Si-Ming Shan, Meng-Di Zhu, Jian-Guang Luo\*, and Ling-Yi Kong\*

*State Key Laboratory of Natural Medicines, Department of Natural Medicinal Chemistry,  
China Pharmaceutical University, 24 Tong Jia Xiang, Nanjing 210009, People's Republic of  
China*

***Corresponding Authors***

\*Tel/Fax: +86-25-8327-1405. E-mail: [cpu\\_lykong@126.com](mailto:cpu_lykong@126.com) (L.-Y. Kong),  
[luojg99@163.com](mailto:luojg99@163.com) (J.-G. Luo).

**Author Contributions**

‡T. Ma and W. N, Zhang contributed equally.

## Supporting Information:

- S1. <sup>1</sup>H NMR spectrum of physagulide A (**1**) in pyridine-*d*<sub>5</sub>
- S2. <sup>13</sup>C NMR spectrum of physagulide A (**1**) in pyridine-*d*<sub>5</sub>
- S3. HRESIMS spectrum of physagulide A (**1**)
- S4. HSQC spectrum of physagulide A (**1**) in pyridine-*d*<sub>5</sub>
- S5. HMBC spectrum of physagulide A (**1**) in pyridine-*d*<sub>5</sub>
- S6. ROESY spectrum of physagulide A (**1**) in pyridine-*d*<sub>5</sub>
- S7. <sup>1</sup>H NMR spectrum of physagulide B (**2**) in pyridine-*d*<sub>5</sub>
- S8. <sup>13</sup>C NMR spectrum of physagulide B (**2**) in pyridine-*d*<sub>5</sub>
- S9. HRESIMS spectrum of physagulide B (**2**)
- S10. HSQC spectrum of physagulide B (**2**) in pyridine-*d*<sub>5</sub>
- S11. HMBC spectrum of physagulide B (**2**) in pyridine-*d*<sub>5</sub>
- S12. ROESY spectrum of physagulide B (**2**) in pyridine-*d*<sub>5</sub>
- S13. <sup>1</sup>H NMR spectrum of physagulide C (**3**) in pyridine-*d*<sub>5</sub>
- S14. <sup>13</sup>C NMR spectrum of physagulide C (**3**) in pyridine-*d*<sub>5</sub>
- S15. HRESIMS spectrum of physagulide C (**3**)
- S16. HSQC spectrum of physagulide C (**3**) in pyridine-*d*<sub>5</sub>
- S17. HMBC spectrum of physagulide C (**3**) in pyridine-*d*<sub>5</sub>
- S18. ROESY spectrum of physagulide C (**3**) in pyridine-*d*<sub>5</sub>
- S19. <sup>1</sup>H NMR spectrum of physagulide D (**4**) in pyridine-*d*<sub>5</sub>
- S20. <sup>13</sup>C NMR spectrum of physagulide D (**4**) in pyridine-*d*<sub>5</sub>
- S21. HRESIMS spectrum of physagulide D (**4**)
- S22. HSQC spectrum of physagulide D (**4**) in pyridine-*d*<sub>5</sub>
- S23. HMBC spectrum of physagulide D (**4**) in pyridine-*d*<sub>5</sub>
- S24. ROESY spectrum of physagulide D (**4**) in pyridine-*d*<sub>5</sub>
- S25. <sup>1</sup>H NMR spectrum of physagulide E (**5**) in pyridine-*d*<sub>5</sub>
- S26. <sup>13</sup>C NMR spectrum of physagulide E (**5**) in pyridine-*d*<sub>5</sub>
- S27. HRESIMS spectrum of physagulide E (**5**)
- S28. HSQC spectrum of physagulide E (**5**) in pyridine-*d*<sub>5</sub>

- S29. HMBC spectrum of physagulide E (**5**) in pyridine-*d*<sub>5</sub>
- S30. ROESY spectrum of physagulide E (**5**) in pyridine-*d*<sub>5</sub>
- S31. <sup>1</sup>H NMR spectrum of physagulide F (**6**) in pyridine-*d*<sub>5</sub>
- S32. <sup>13</sup>C NMR spectrum of physagulide F (**6**) in pyridine-*d*<sub>5</sub>
- S33. HRESIMS spectrum of physagulide F (**6**)
- S34. HSQC spectrum of physagulide F (**6**) in pyridine-*d*<sub>5</sub>
- S35. HMBC spectrum of physagulide F (**6**) in pyridine-*d*<sub>5</sub>
- S36. ROESY spectrum of physagulide F (**6**) in pyridine-*d*<sub>5</sub>
- S37. <sup>1</sup>H NMR spectrum of physagulide G (**7**) in pyridine-*d*<sub>5</sub>
- S38. <sup>13</sup>C NMR spectrum of physagulide G (**7**) in pyridine-*d*<sub>5</sub>
- S39. HRESIMS spectrum of physagulide G (**7**)
- S40. HSQC spectrum of physagulide G (**7**) in pyridine-*d*<sub>5</sub>
- S41. HMBC spectrum of physagulide G (**7**) in pyridine-*d*<sub>5</sub>
- S42. ROESY spectrum of physagulide G (**7**) in pyridine-*d*<sub>5</sub>
- S43. <sup>1</sup>H NMR spectrum of physagulide H (**8**) in pyridine-*d*<sub>5</sub>
- S44. <sup>13</sup>C NMR spectrum of physagulide H (**8**) in pyridine-*d*<sub>5</sub>
- S45. HRESIMS spectrum of physagulide H (**8**)
- S46. HSQC spectrum of physagulide H (**8**) in pyridine-*d*<sub>5</sub>
- S47. HMBC spectrum of physagulide H (**8**) in pyridine-*d*<sub>5</sub>
- S48. ROESY spectrum of physagulide H (**8**) in pyridine-*d*<sub>5</sub>

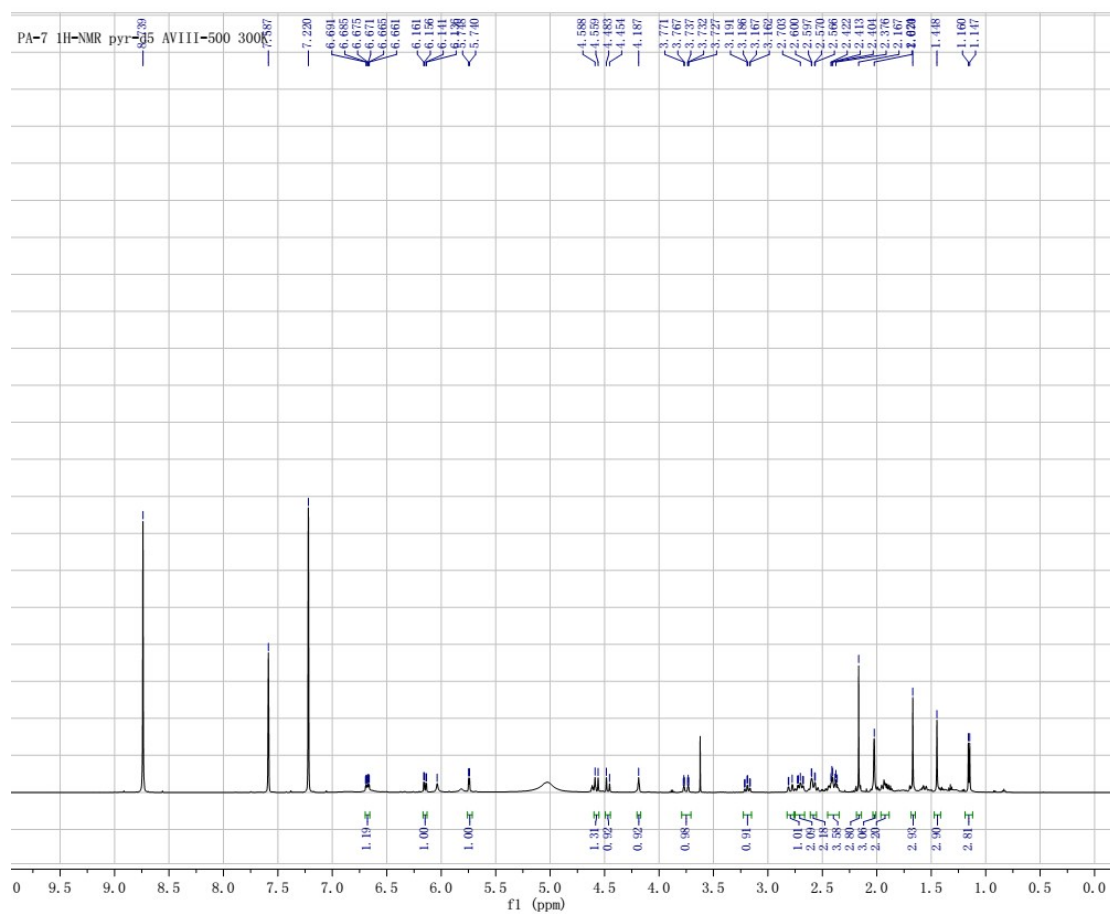

S1. <sup>1</sup>H NMR spectrum of physagulide A (**1**) in pyridine-*d*<sub>5</sub> (500MHz)

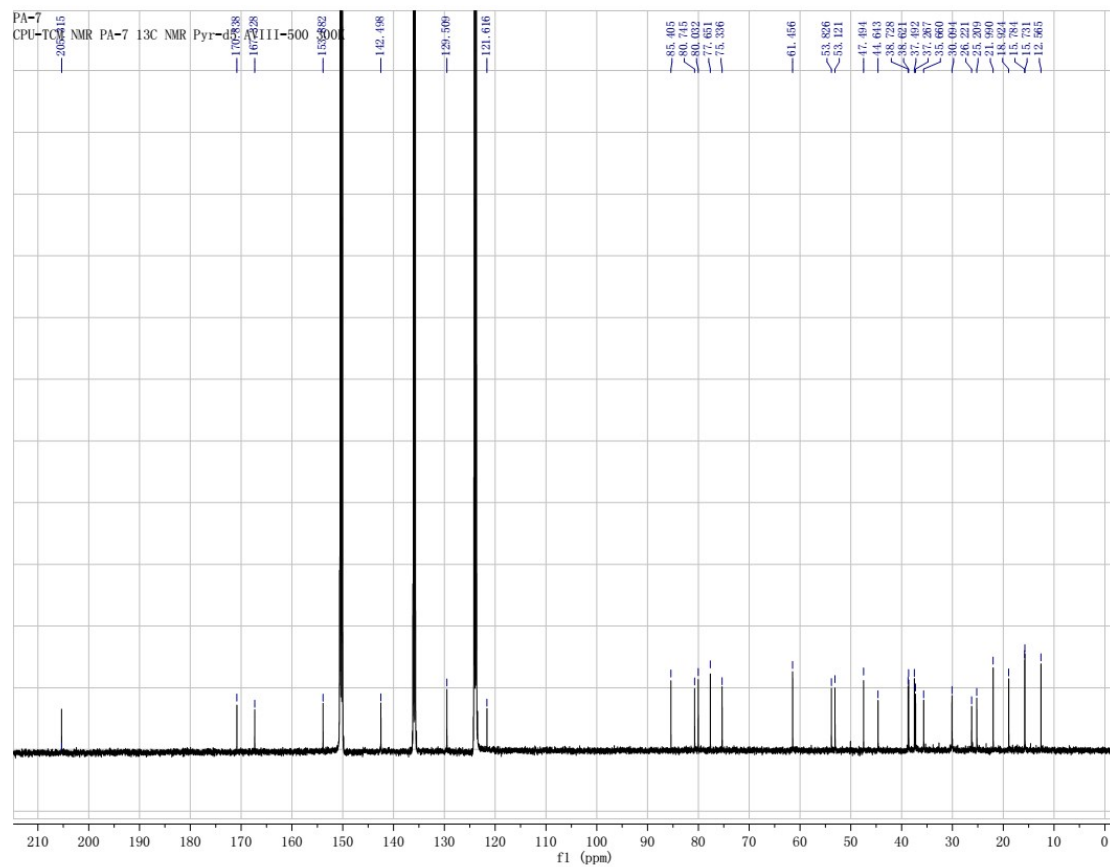

S2.  $^{13}\text{C}$  NMR spectrum of physagulide A (1) in pyridine- $d_5$  (125MHz)

# TCM-CPU HR-ESI-MS Display Report

Sample Name: PA-4

Instrument: Agilent 6520B Q-TOF

Acq. Date: 04/27 /2013

Operator: Administrator

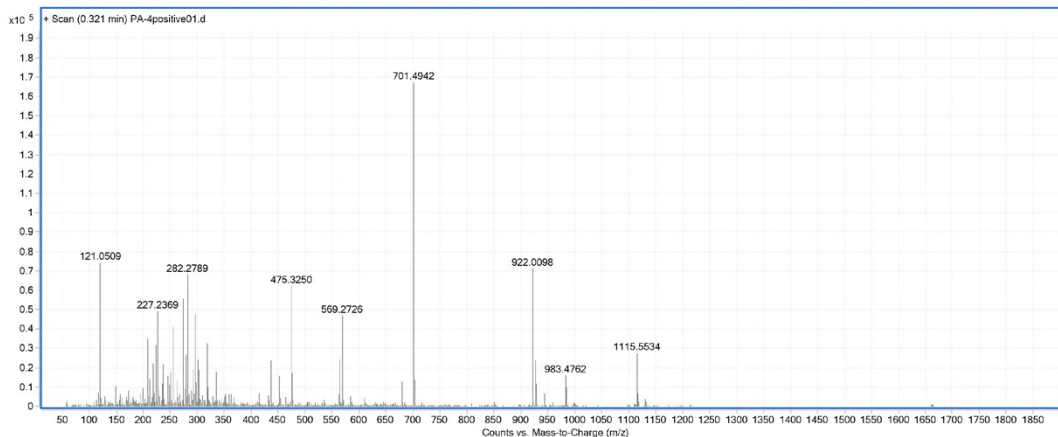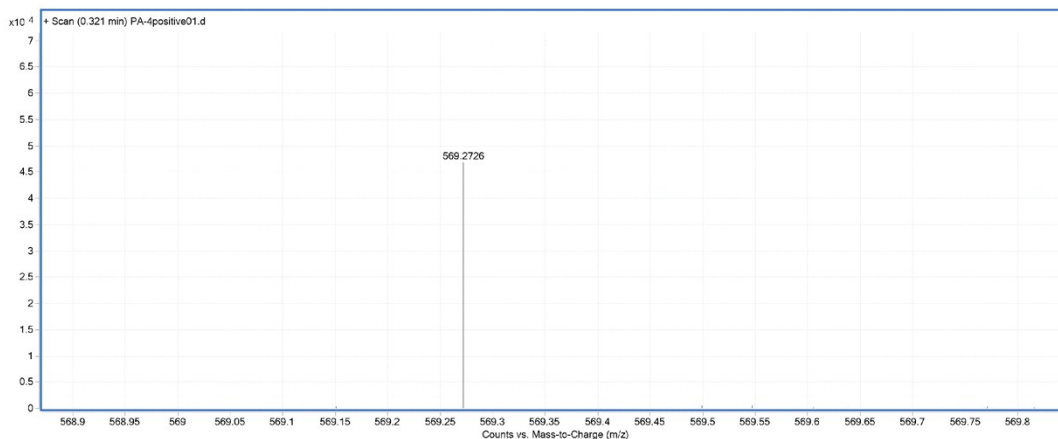

## Elemental Composition Calculator

|                    |                                                            |                     |                  |                 |                     |
|--------------------|------------------------------------------------------------|---------------------|------------------|-----------------|---------------------|
| <b>Target m/z:</b> | 569.2726                                                   | <b>Result type:</b> | Positive ions    | <b>Species:</b> | [M+Na] <sup>+</sup> |
| <b>Elements:</b>   | C (0-100); H (0-150); O (0-50); N(0-10); Na (0-5); S (0-5) |                     |                  |                 |                     |
| <b>Ion Formula</b> | <b>Calculated m/z</b>                                      |                     | <b>PPM Error</b> |                 |                     |
| C30H42NaO9         | 569.2721                                                   |                     | -0.80            |                 |                     |

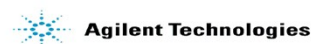

S3. HRESIMS spectrum of physagulide A (1)

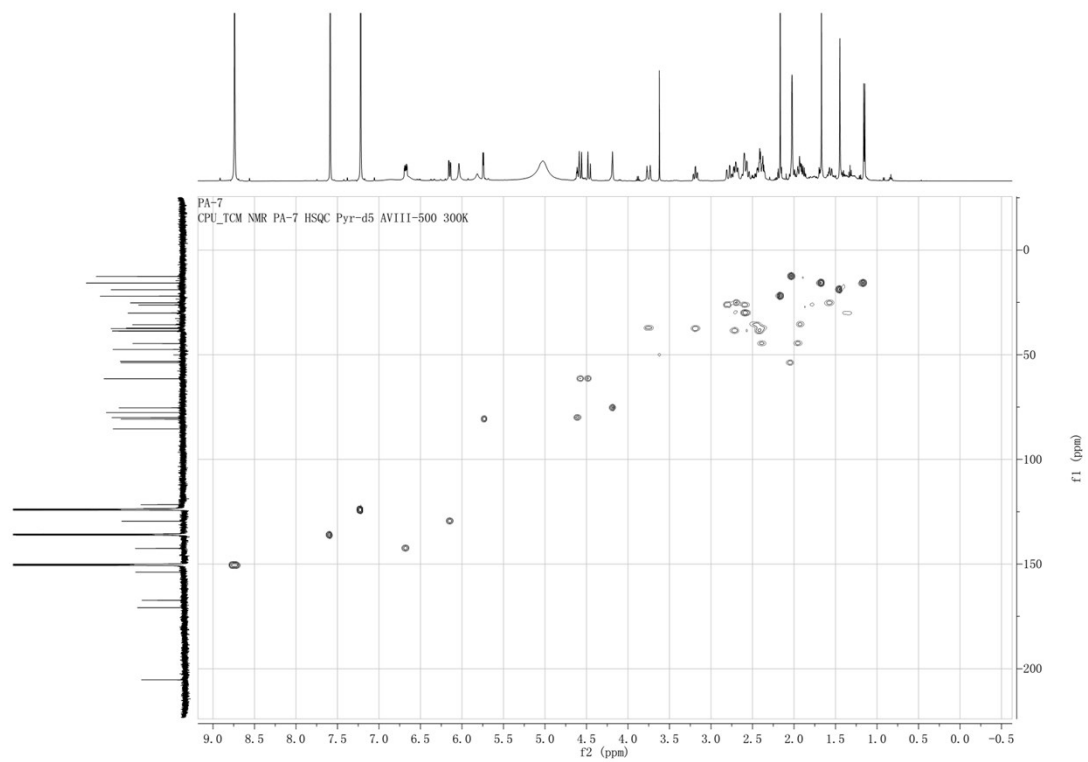

S4. HSQC spectrum of physagulide A (1) in pyridine- $d_5$

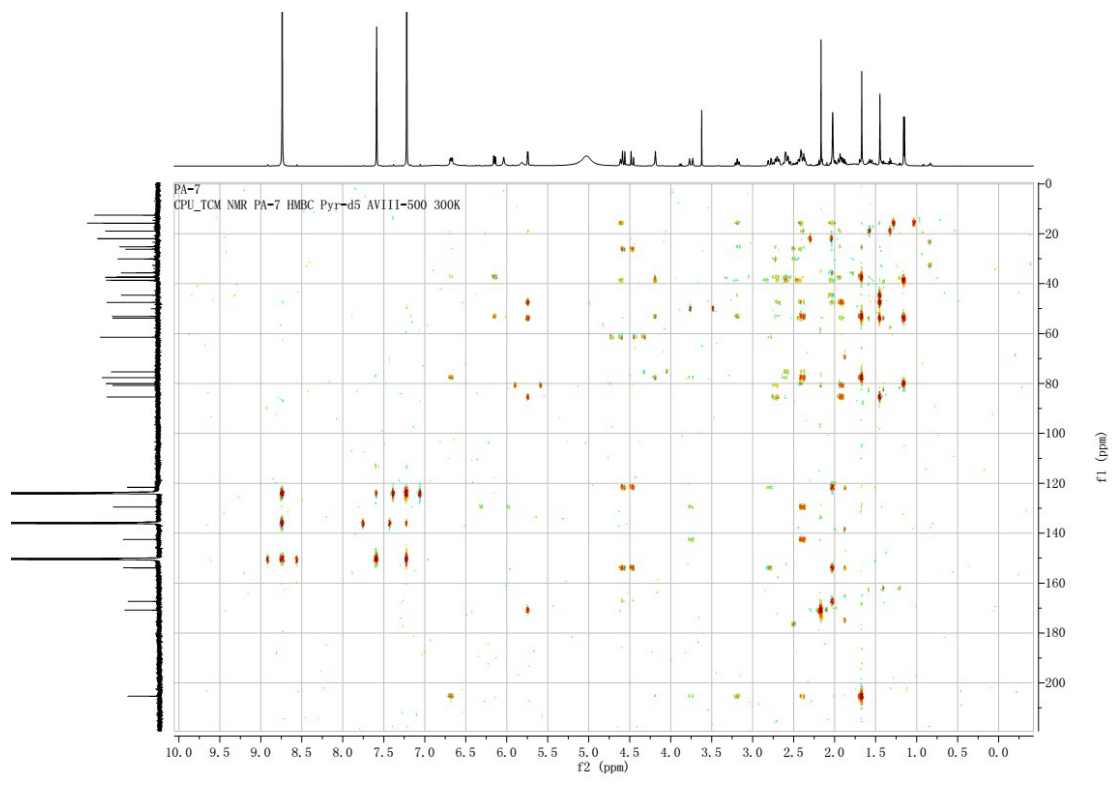

S5. HMBC spectrum of physagulide A (1) in pyridine-*d*<sub>5</sub>



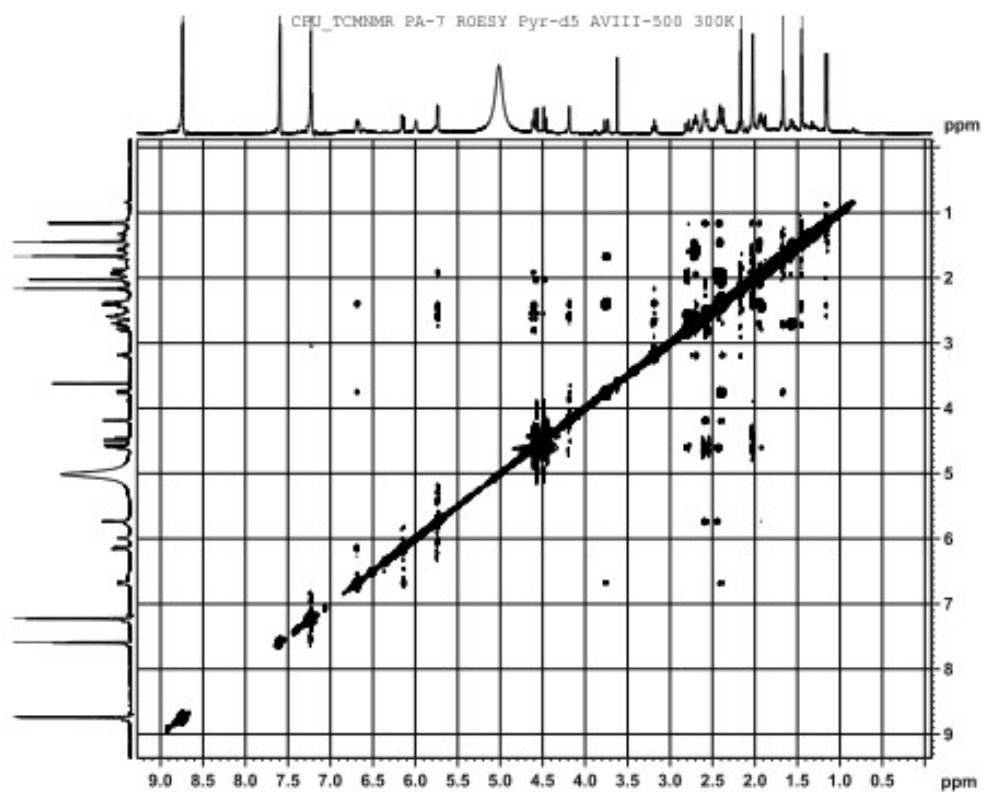

S6. ROESY spectrum of of physagulide A (1) in pyridine- $d_5$

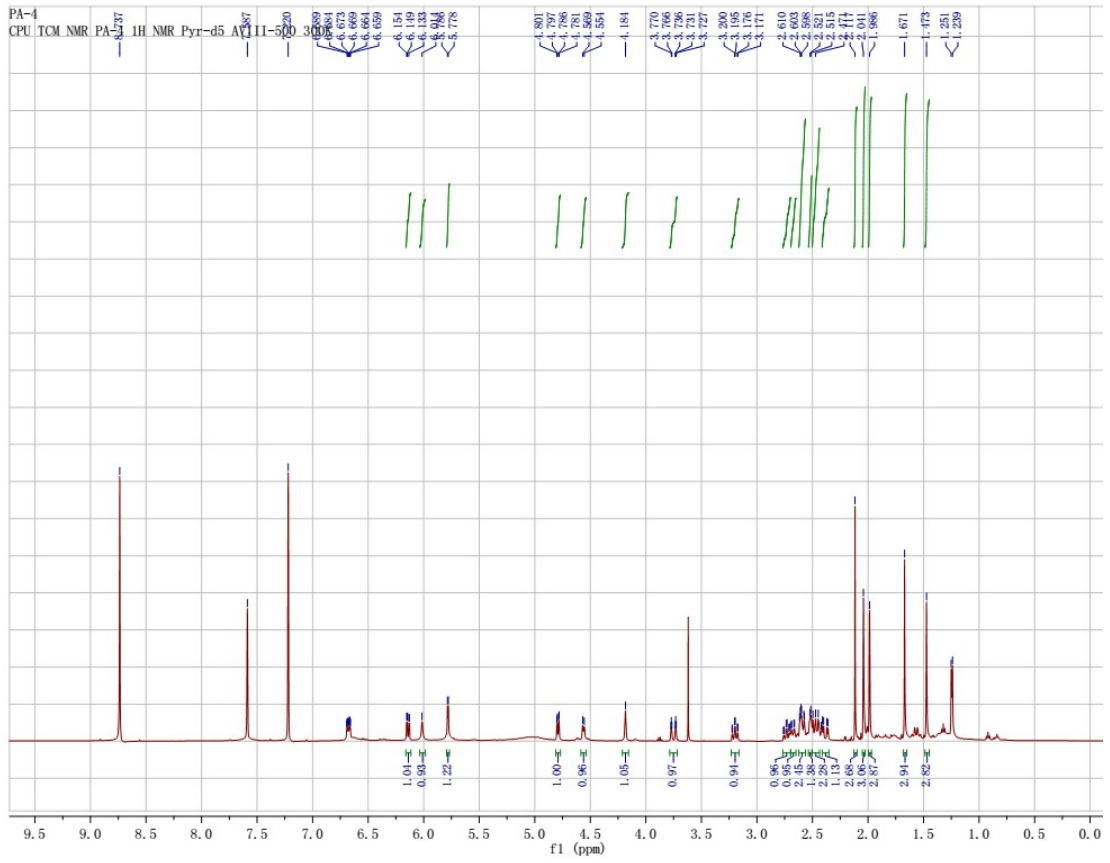

S7.  $^1\text{H}$  NMR spectrum of physaglide B (**2**) in pyridine- $d_5$  (500MHz)

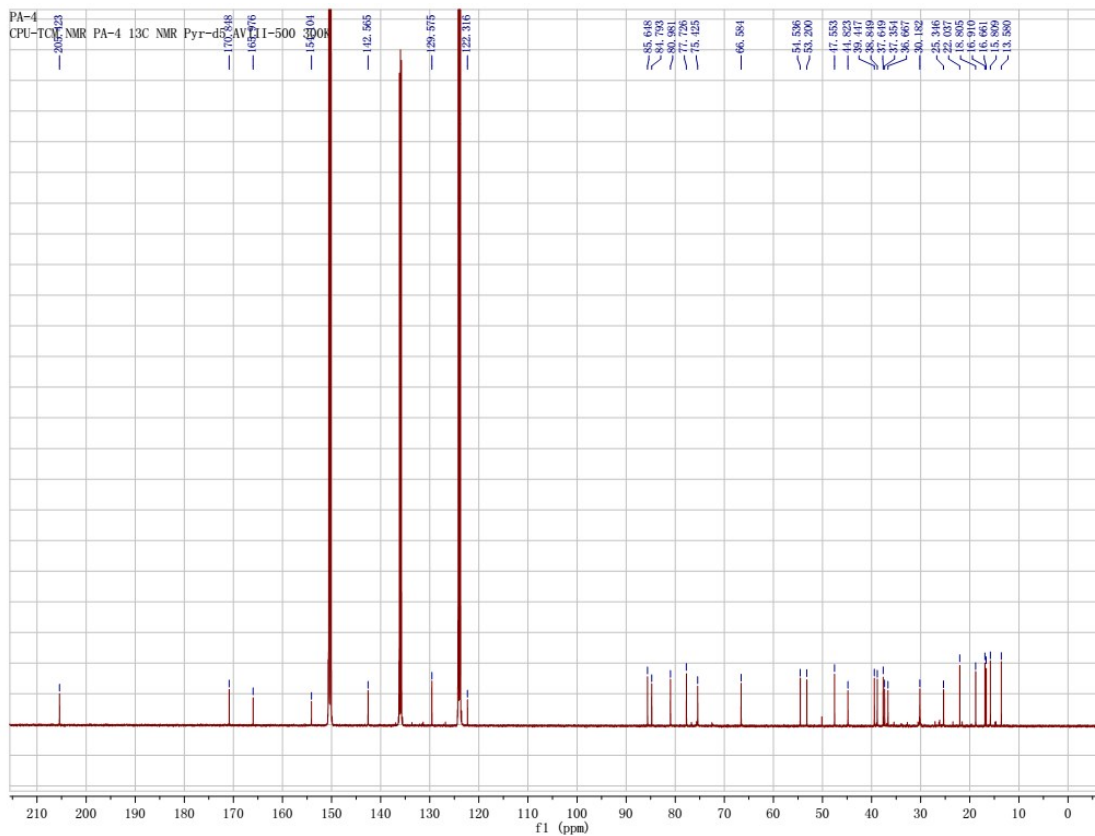

S8.  $^{13}\text{C}$  NMR spectrum of physagulide B (2) in pyridine- $d_5$  (125MHz)

# TCM-CPU HR-ESI-MS Display Report

Sample Name: PA-7

Instrument: Agilent 6520B Q-TOF

Acq. Date: 04/27 /2013

Operator: Administrator

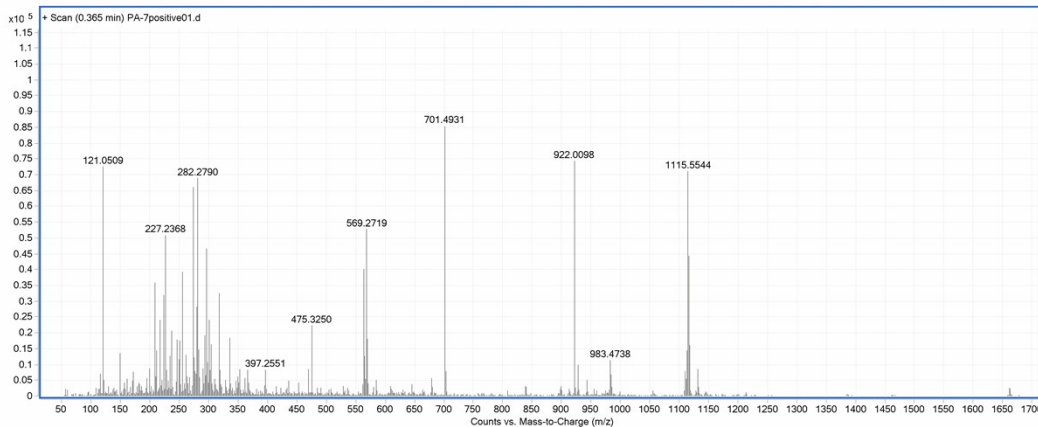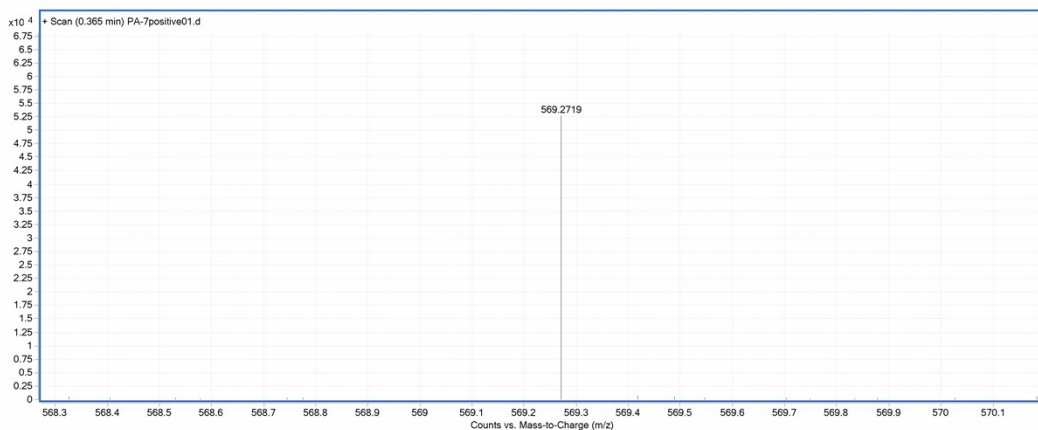

## Elemental Composition Calculator

|                    |                                                            |                     |                  |                 |                     |
|--------------------|------------------------------------------------------------|---------------------|------------------|-----------------|---------------------|
| <b>Target m/z:</b> | 569.2719                                                   | <b>Result type:</b> | Positive ions    | <b>Species:</b> | [M+Na] <sup>+</sup> |
| <b>Elements:</b>   | C (0-100); H (0-150); O (0-50); N(0-10); Na (0-5); S (0-5) |                     |                  |                 |                     |
| <b>Ion Formula</b> | <b>Calculated m/z</b>                                      |                     | <b>PPM Error</b> |                 |                     |
| C30H42NaO9         | 569.2721                                                   |                     | 0.43             |                 |                     |

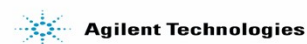

S9. HRESIMS spectrum of physagulide B (2)

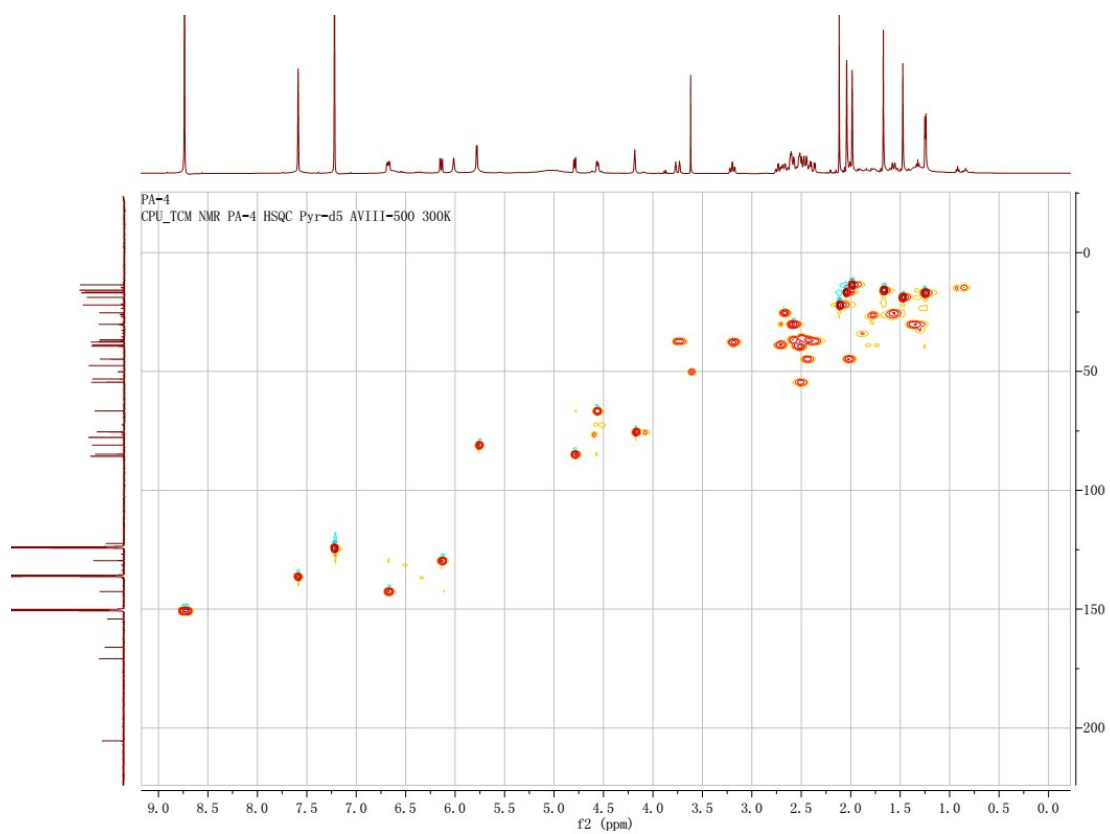

S10. HSQC spectrum of physagulide B (**2**) in pyridine- $d_5$

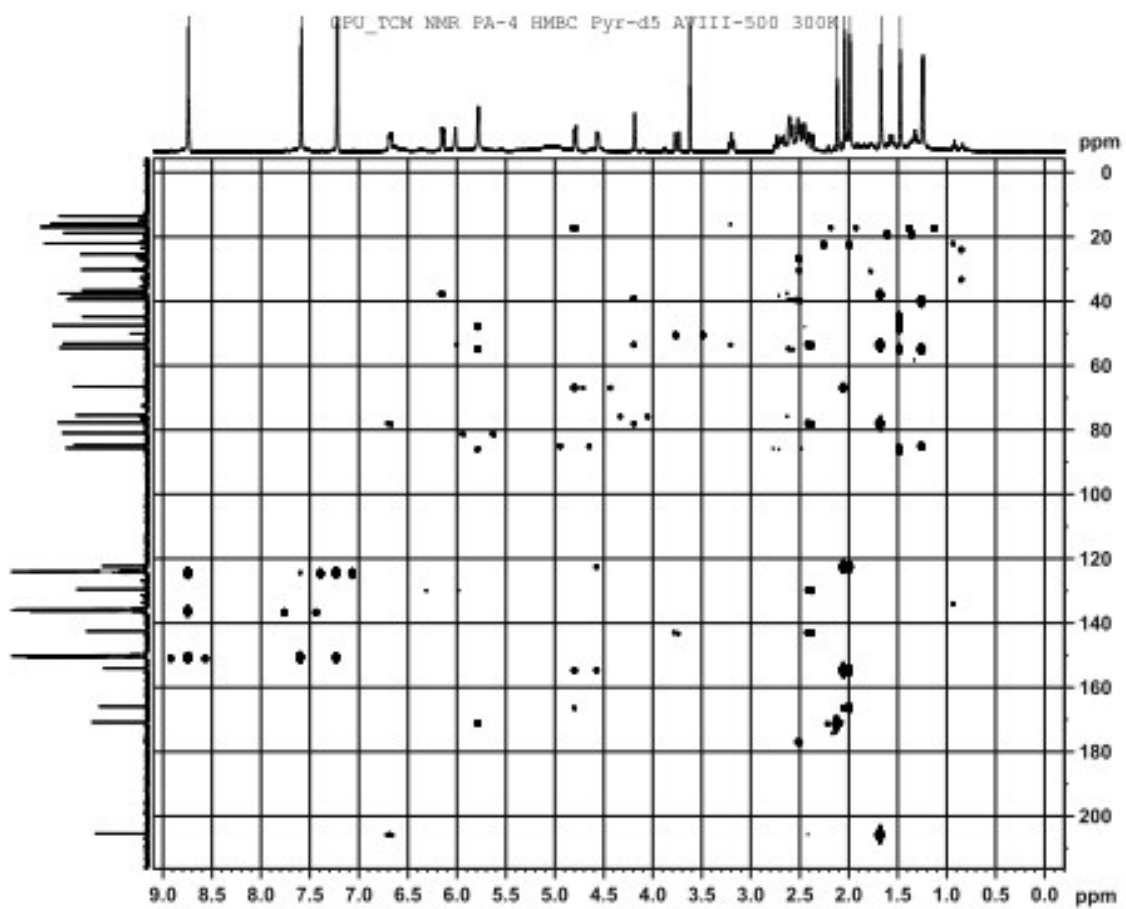

S11. HMBC spectrum of physagulide B (2) in pyridine- $d_5$

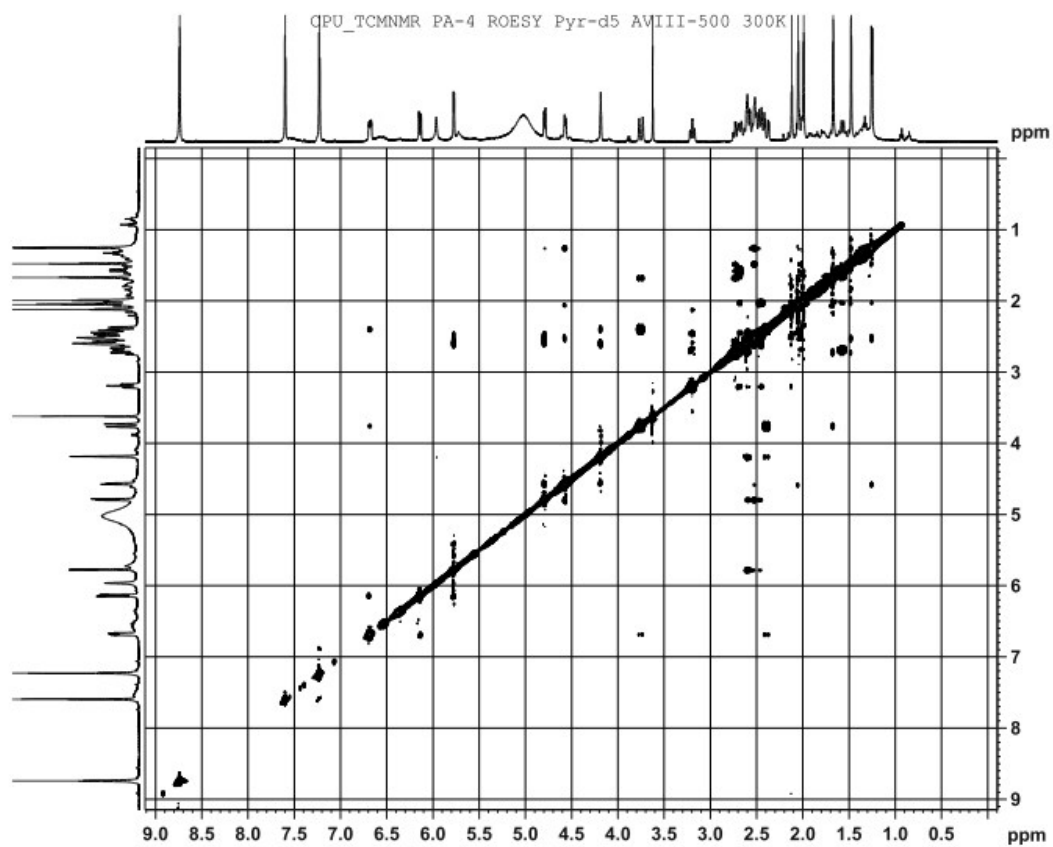

S12. ROESY spectrum of physagulide B (2) in pyridine- $d_5$

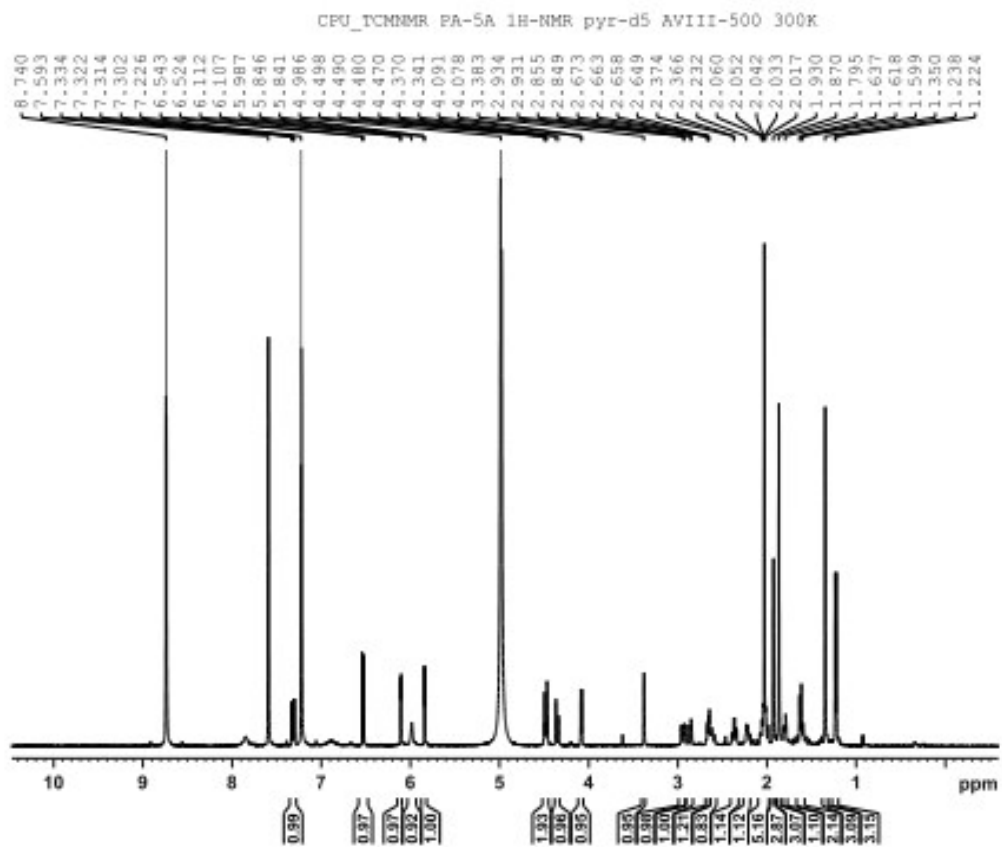

S13.  $^1\text{H}$  NMR spectrum of physagulide C (**3**) in pyridine- $d_5$  (500MHz)



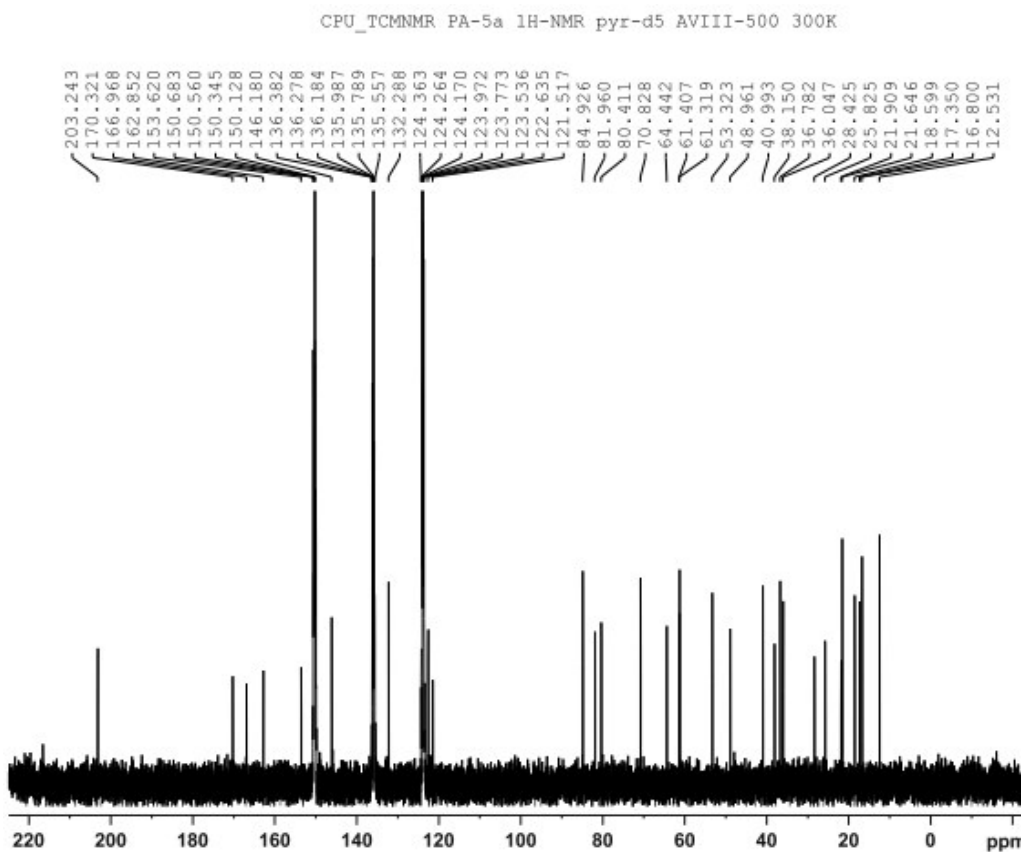

S14.  $^{13}\text{C}$  NMR spectrum of physagulide C (**3**) in pyridine- $d_5$  (125MHz)

# TCM-CPU HR-ESI-MS Display Report

Sample Name: PA-5a

Instrument: Agilent 6520B Q-TOF

Acq. Date: 04/27 /2013

Operator: Administrator

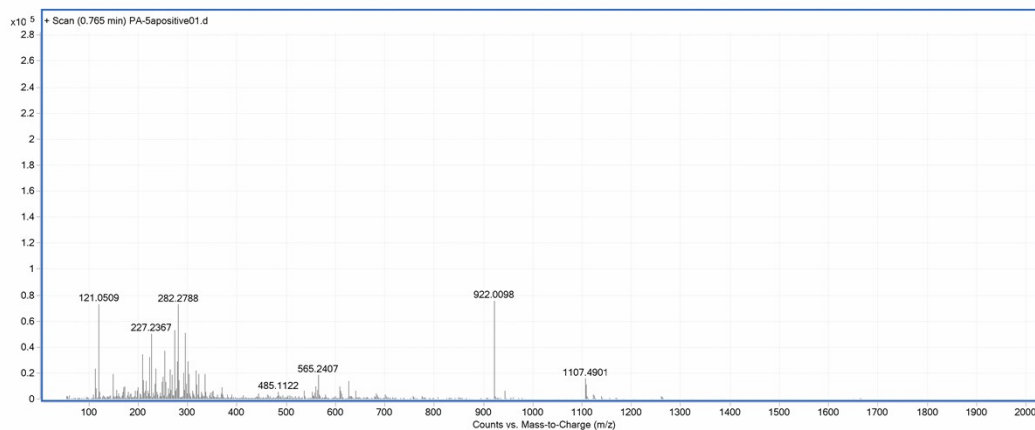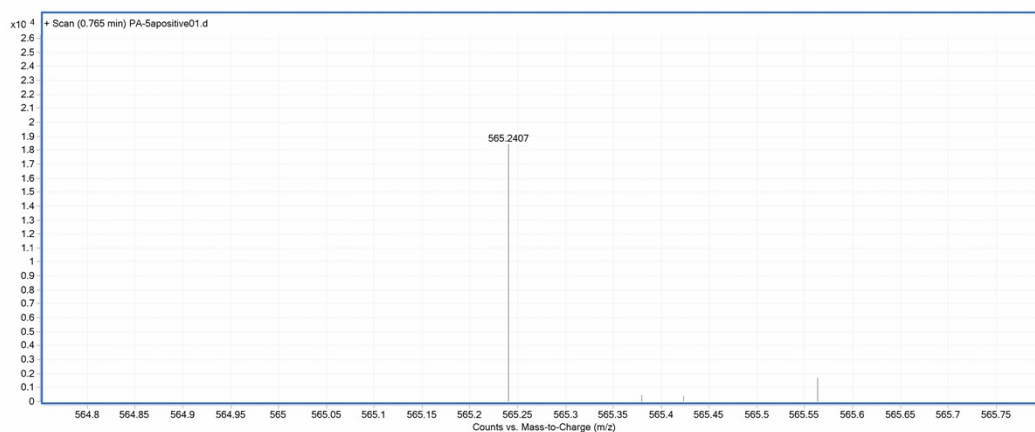

## Elemental Composition Calculator

|                    |                                                            |                     |                  |                 |                     |
|--------------------|------------------------------------------------------------|---------------------|------------------|-----------------|---------------------|
| <b>Target m/z:</b> | 565.2407                                                   | <b>Result type:</b> | Positive ions    | <b>Species:</b> | [M+Na] <sup>+</sup> |
| <b>Elements:</b>   | C (0-100); H (0-150); O (0-50); N(0-10); Na (0-5); S (0-5) |                     |                  |                 |                     |
| <b>Ion Formula</b> | <b>Calculated m/z</b>                                      |                     | <b>PPM Error</b> |                 |                     |
| C30H38NaO9         | 565.2408                                                   |                     | 0.17             |                 |                     |

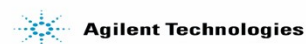

S15. HRESIMS spectrum of physagulide C (3)

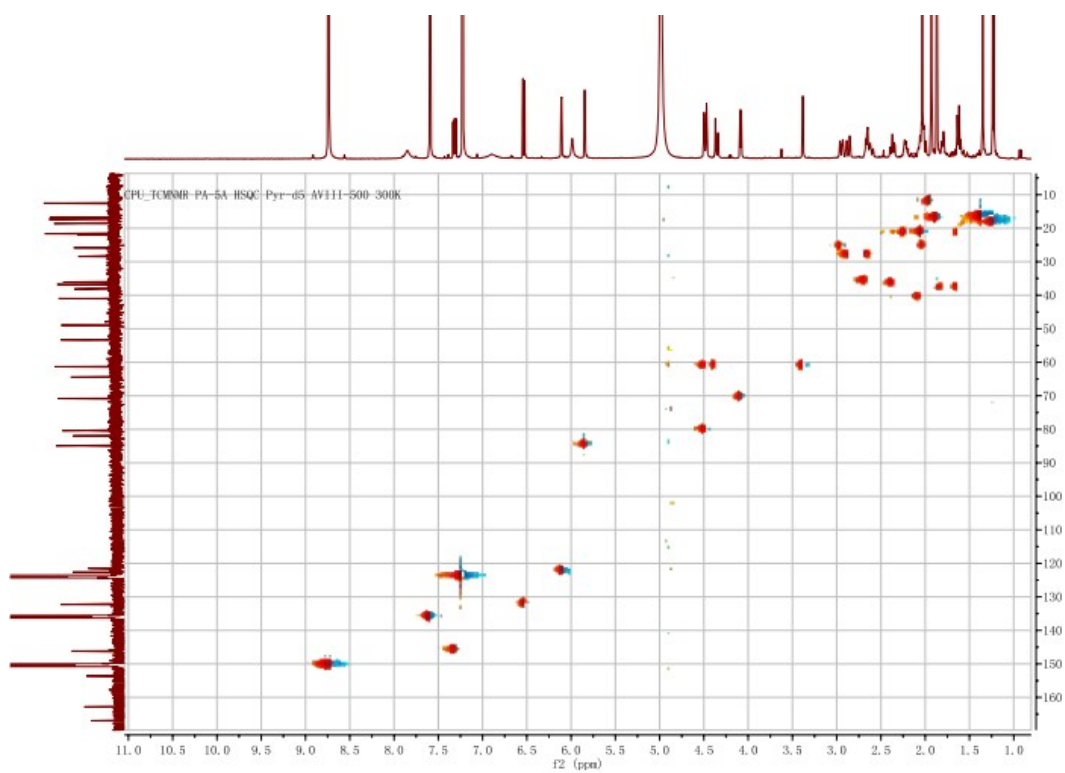

S16. HSQC spectrum of physagulide C (**3**) in pyridine- $d_5$

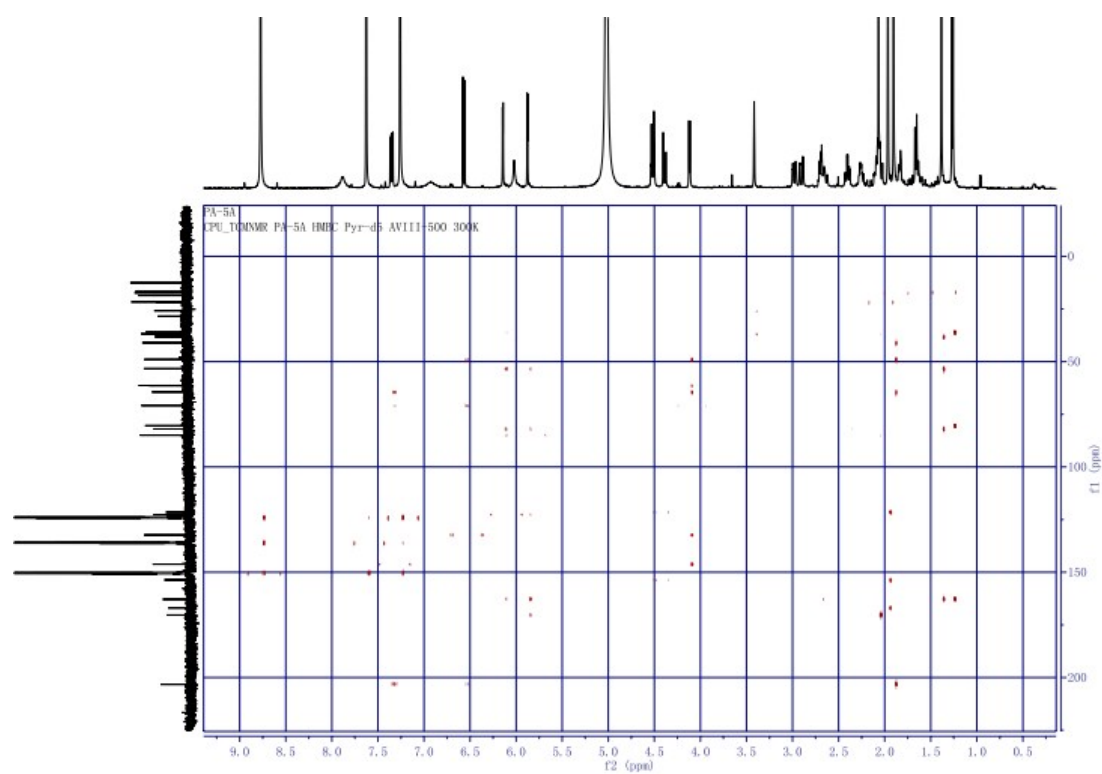

S17. HMBC spectrum of physagulide C (**3**) in pyridine- $d_5$

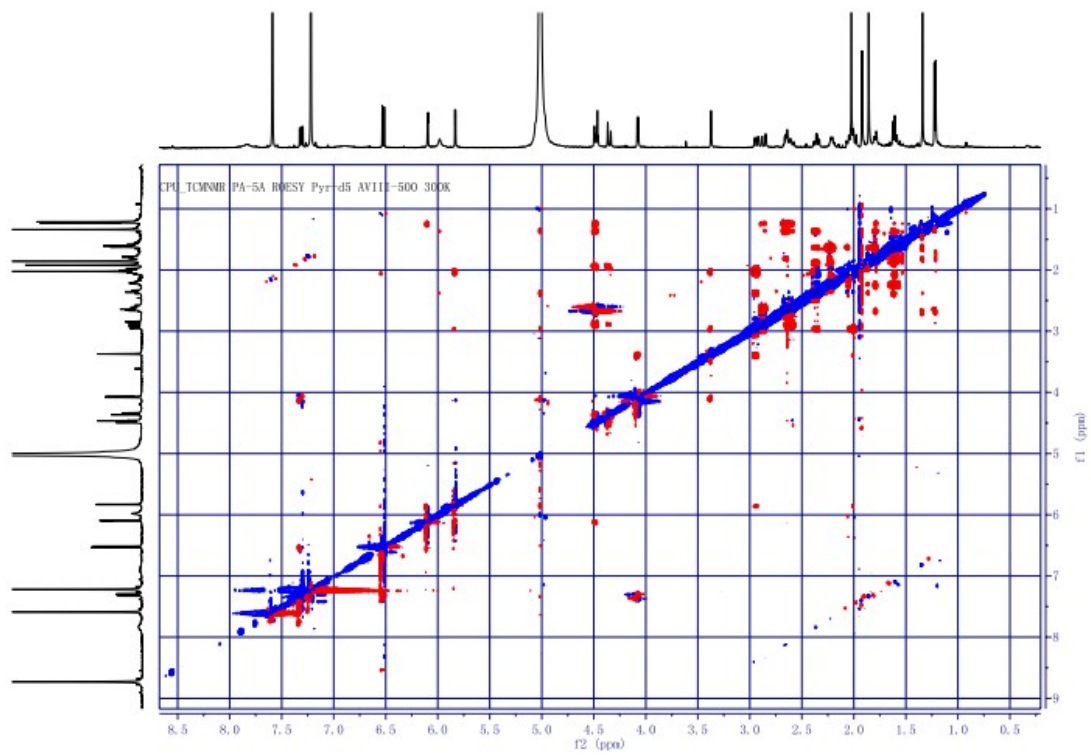

S18. ROESY spectrum of physagulide C (**3**) in pyridine-*d*<sub>5</sub>

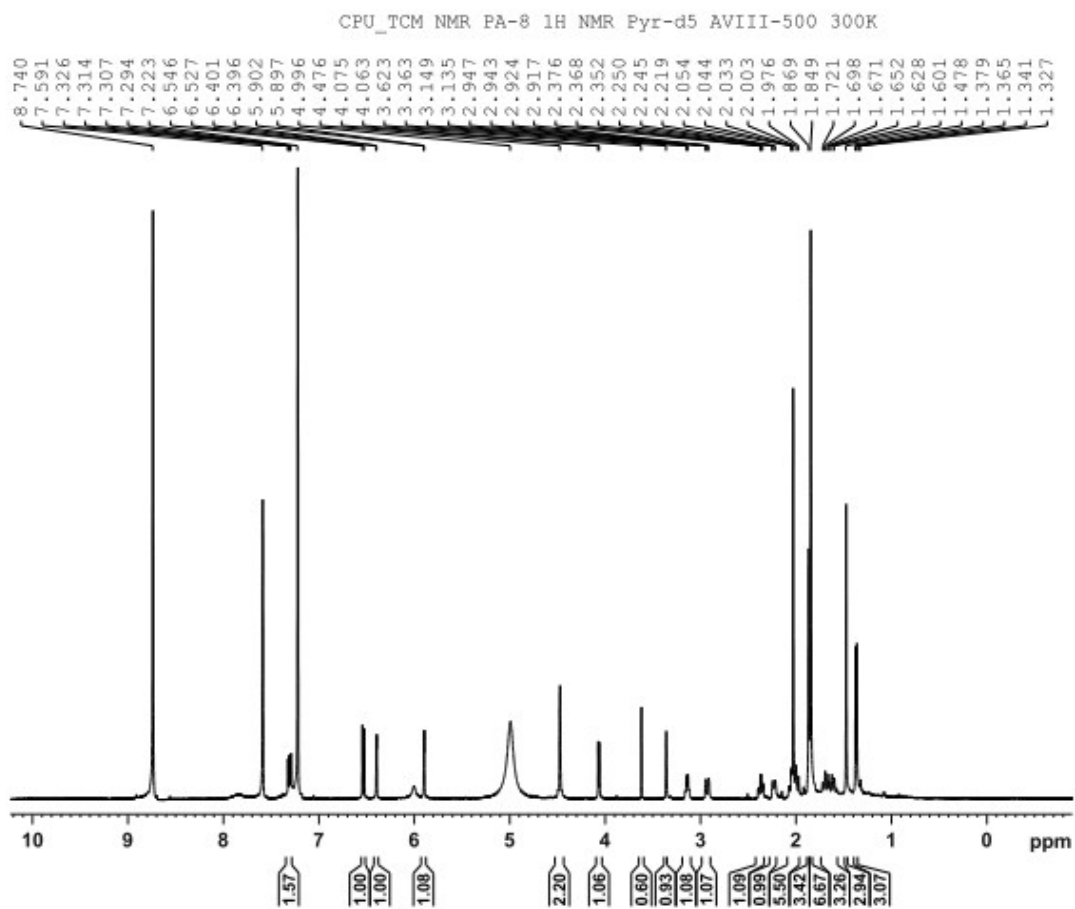

S19. <sup>1</sup>H NMR spectrum of physagulide D (**4**) in pyridine-*d*<sub>5</sub> (500MHz)

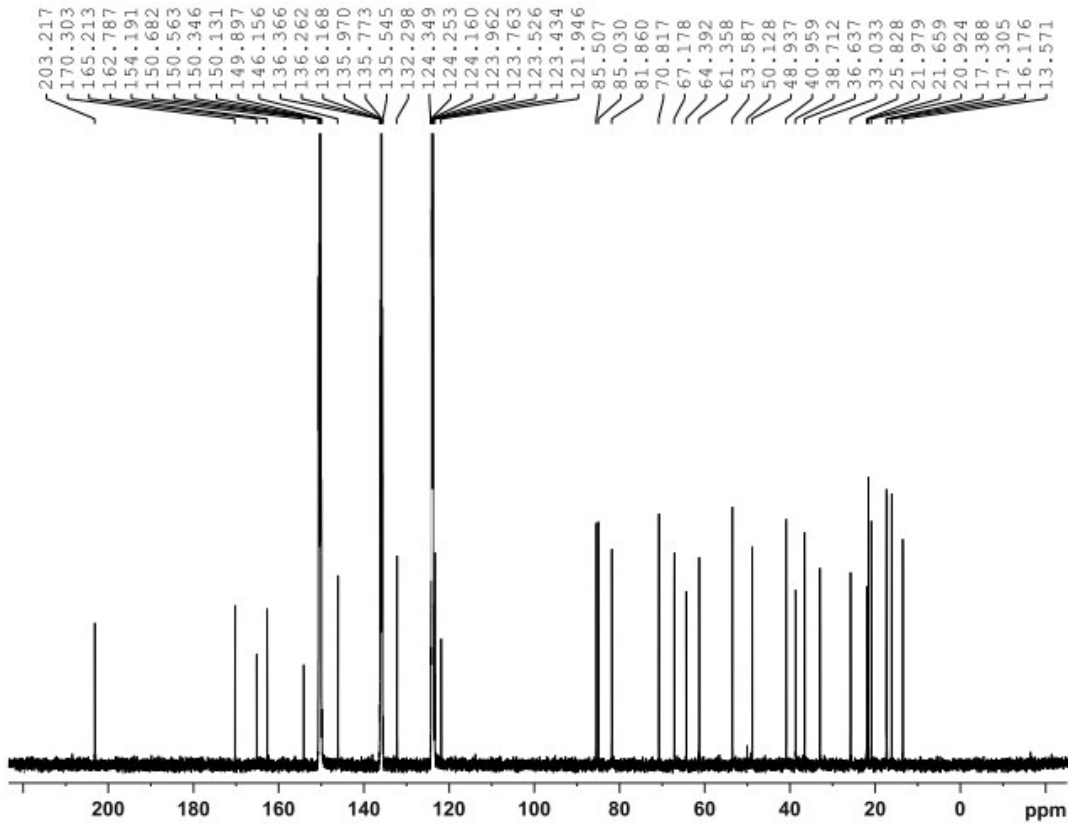

S20. <sup>13</sup>C NMR spectrum of physagulide D (4) in pyridine-*d*<sub>5</sub> (125MHz)

# TCM-CPU HR-ESI-MS Display Report

Sample Name: PA-8

Instrument: Agilent 6520B Q-TOF

Acq. Date: 04/27 /2013

Operator: Administrator

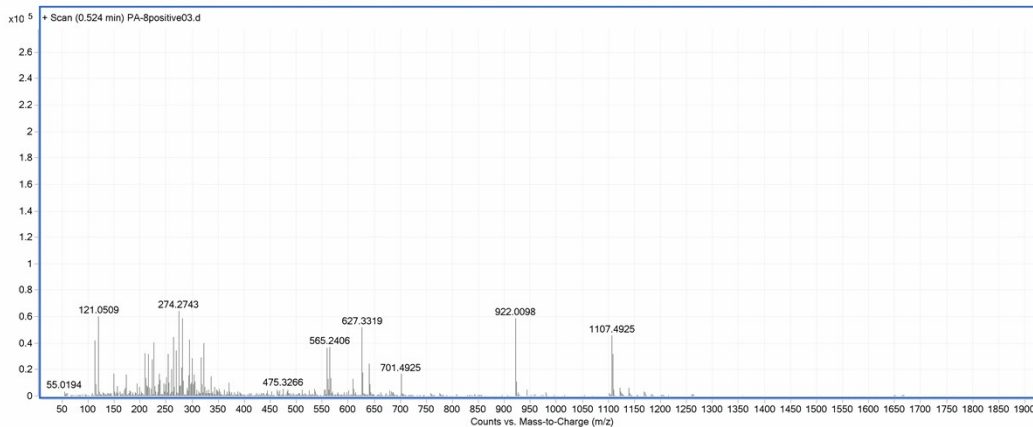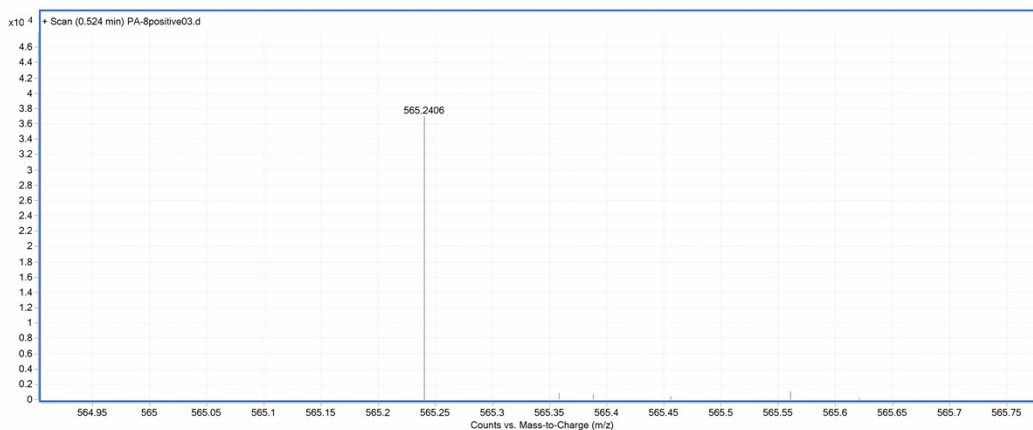

## Elemental Composition Calculator

|                    |                                                            |                     |                  |                 |                     |
|--------------------|------------------------------------------------------------|---------------------|------------------|-----------------|---------------------|
| <b>Target m/z:</b> | 565.2406                                                   | <b>Result type:</b> | Positive ions    | <b>Species:</b> | [M+Na] <sup>+</sup> |
| <b>Elements:</b>   | C (0-100); H (0-150); O (0-50); N(0-10); Na (0-5); S (0-5) |                     |                  |                 |                     |
| <b>Ion Formula</b> | <b>Calculated m/z</b>                                      |                     | <b>PPM Error</b> |                 |                     |
| C30H38NaO9         | 565.2408                                                   |                     | 0.41             |                 |                     |

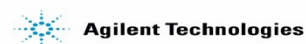

S21. HRESIMS spectrum of physagulide D (4)



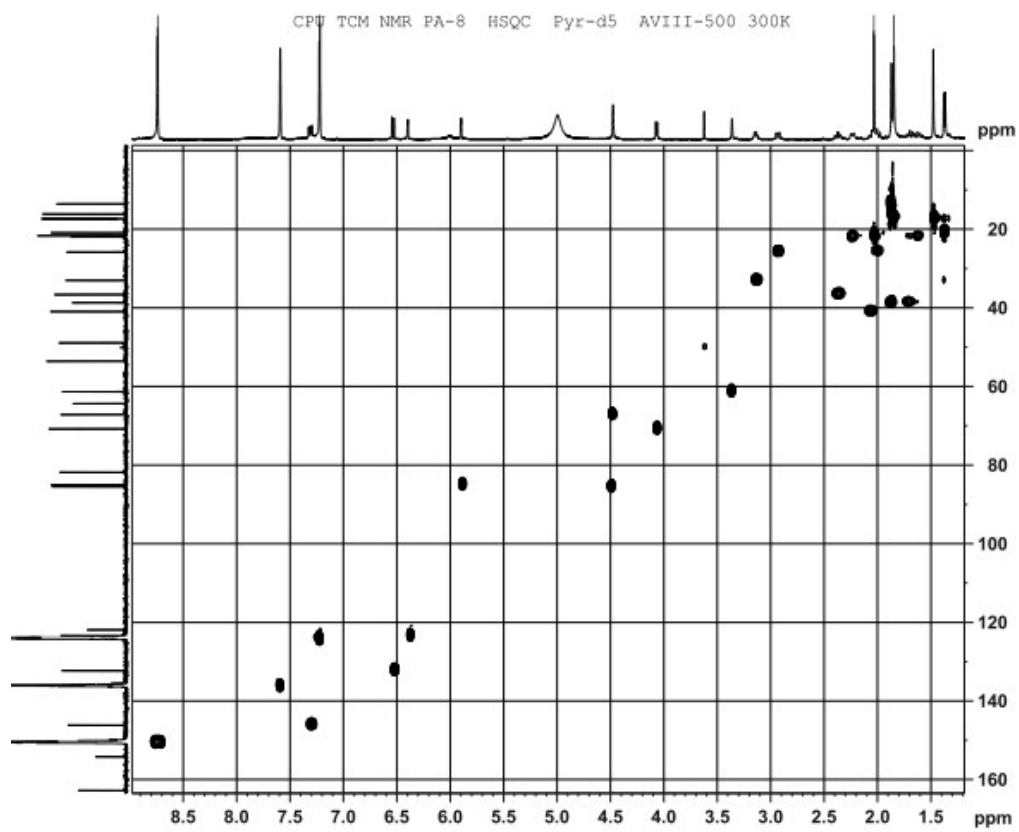

S22. HSQC spectrum of physagulide D (**4**) in pyridine- $d_5$

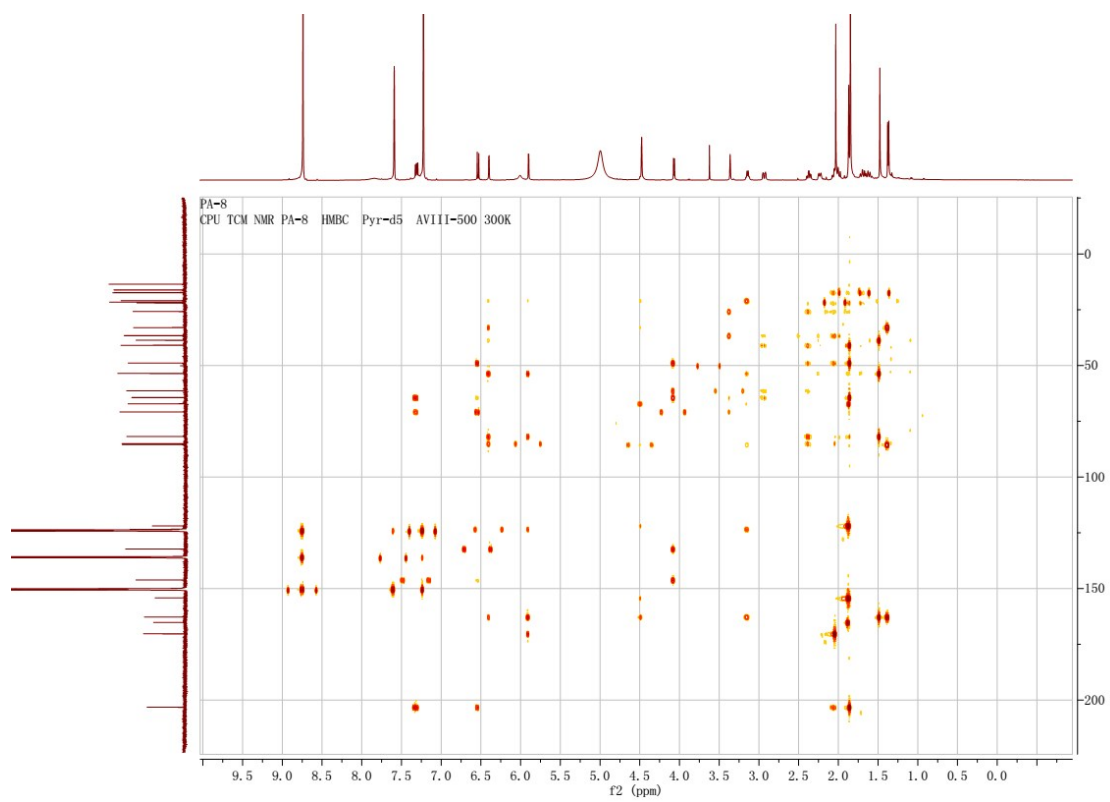

S23. HMBC spectrum of physagulide D (**4**) in pyridine- $d_5$

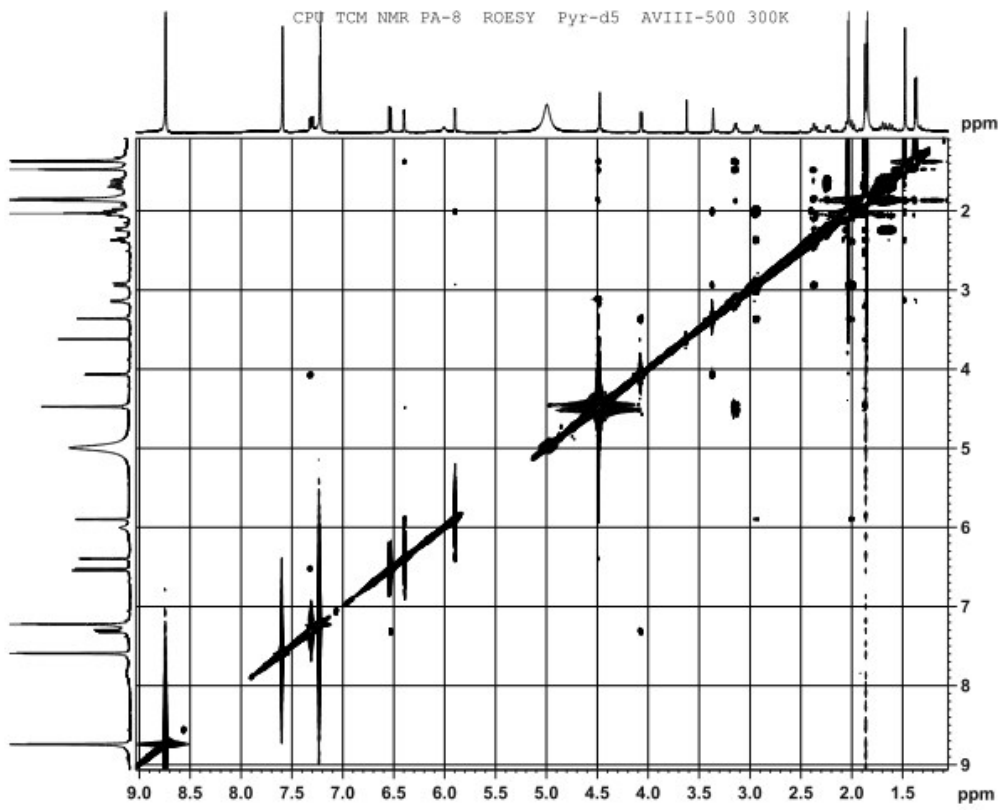

S24. ROESY spectrum of physagulide D (4) in pyridine- $d_5$

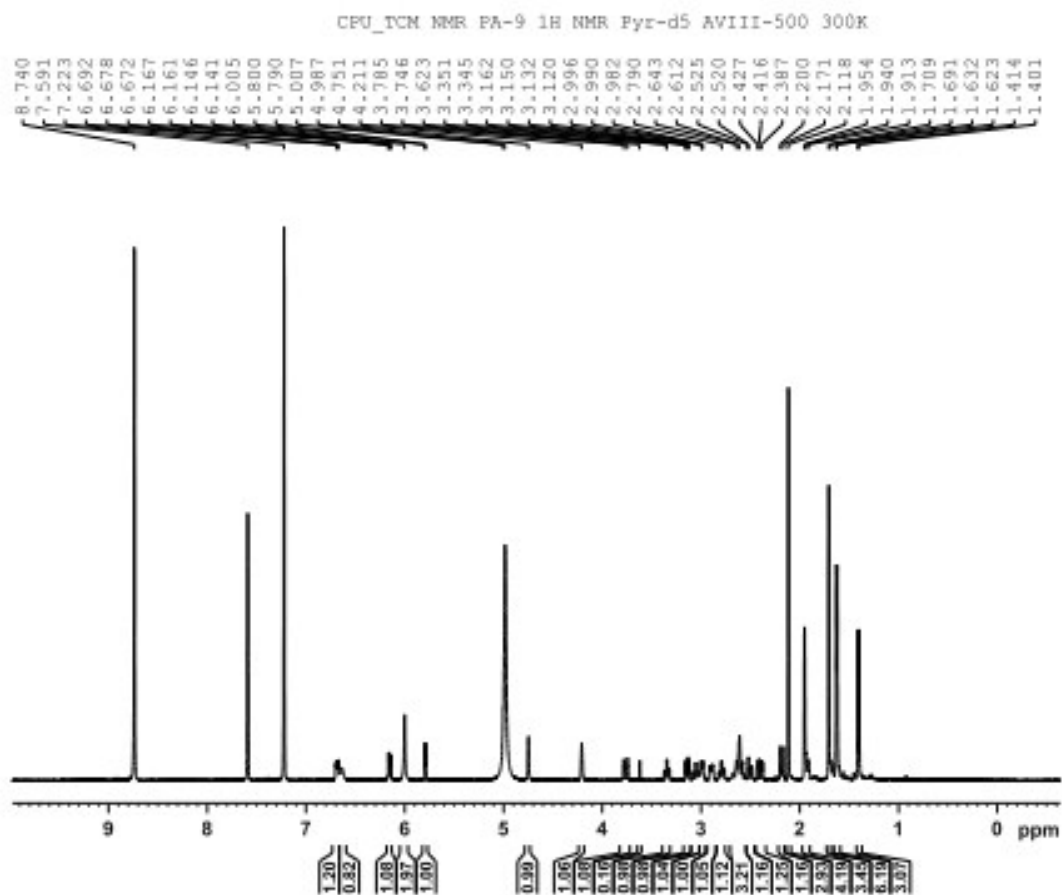

S25.  $^1\text{H}$  NMR spectrum of physagulide E (**5**) in pyridine- $d_5$  (500MHz)

CPU\_TCM NMR PA-9 13C NMR Pyr-d5 AVIII-500 300K

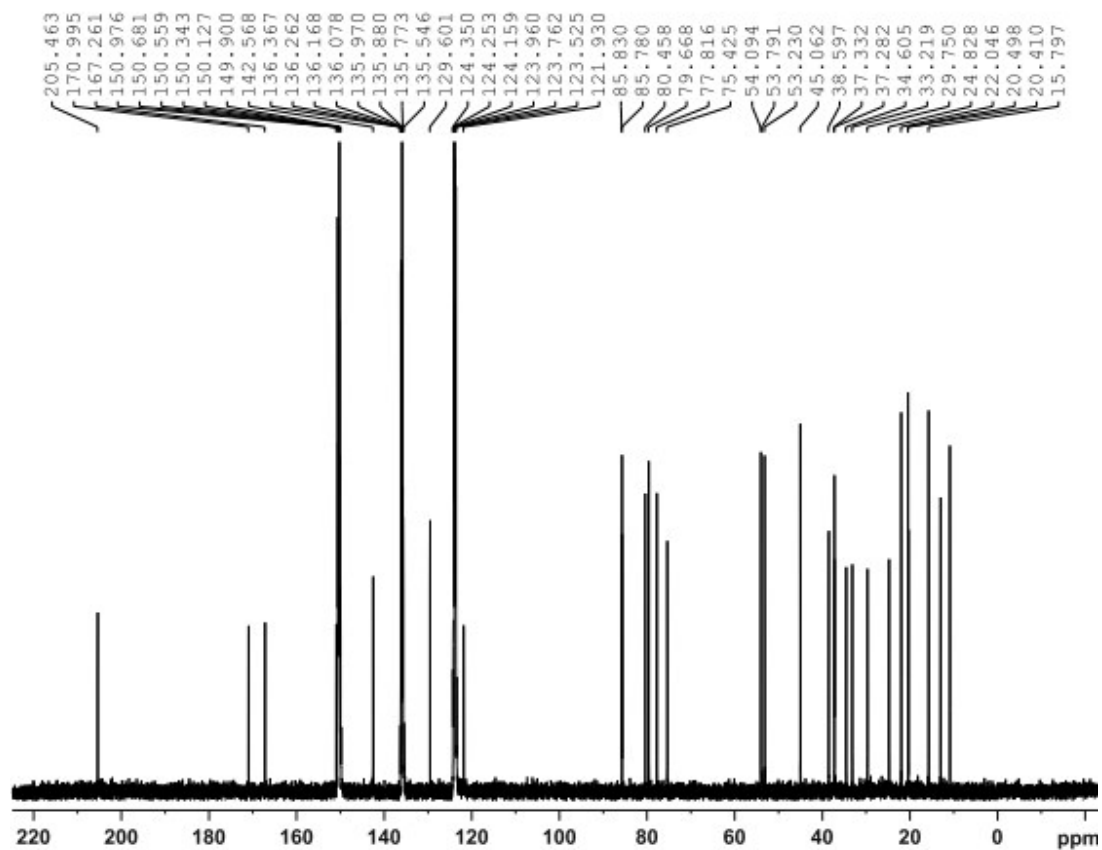

S26.  $^{13}\text{C}$  NMR spectrum of physagulide E (**5**) in pyridine- $d_5$  (125MHz)

# TCM-CPU HR-ESI-MS Display Report

Sample Name: PA-9

Instrument: Agilent 6520B Q-TOF

Acq. Date: 01/18 /2013

Operator: Administrator

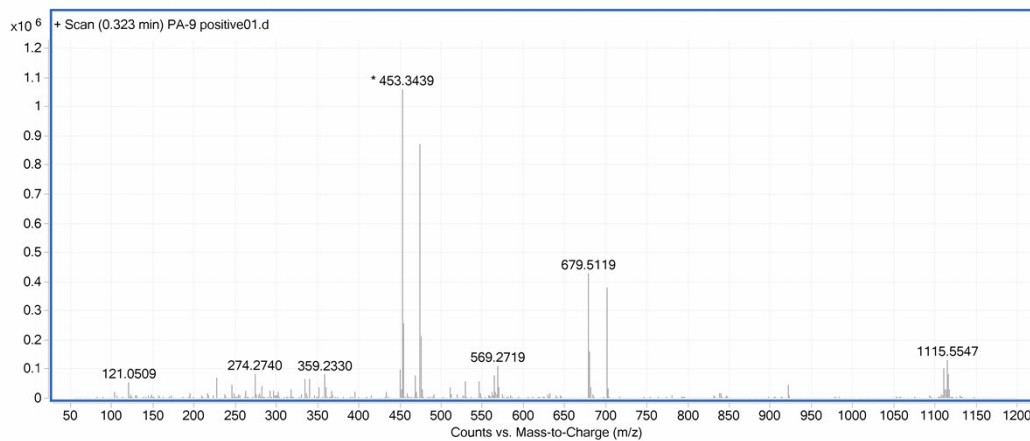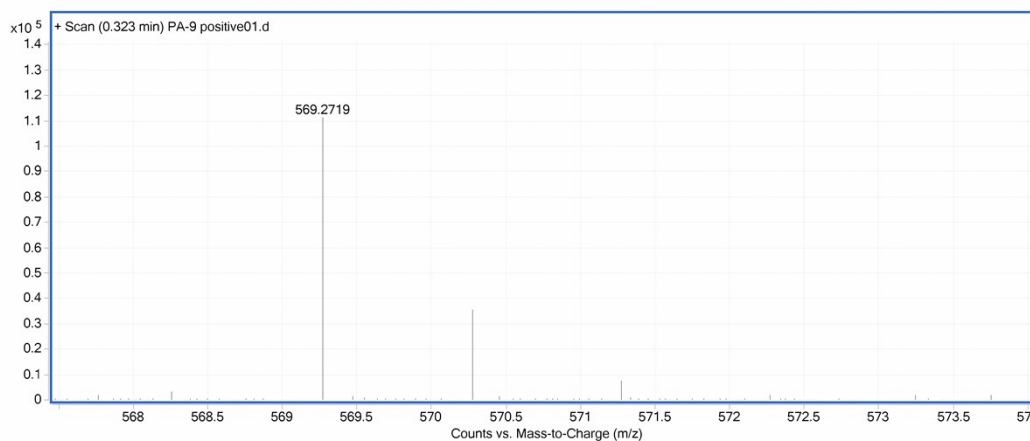

## Elemental Composition Calculator

|             |                                                           |              |               |          |                     |
|-------------|-----------------------------------------------------------|--------------|---------------|----------|---------------------|
| Target m/z: | 569.2719                                                  | Result type: | Positive ions | Species: | [M+Na] <sup>+</sup> |
| Elements:   | C (0-80); H (0-120); O (0-30); N(0-10); Na (0-5); S (0-5) |              |               |          |                     |
| Ion Formula | Calculated m/z                                            |              | PPM Error     |          |                     |
| C30H42NaO9  | 569.2721                                                  |              | 0.32          |          |                     |

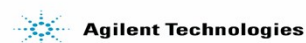

S27. HRESIMS spectrum of physagulide E (5)

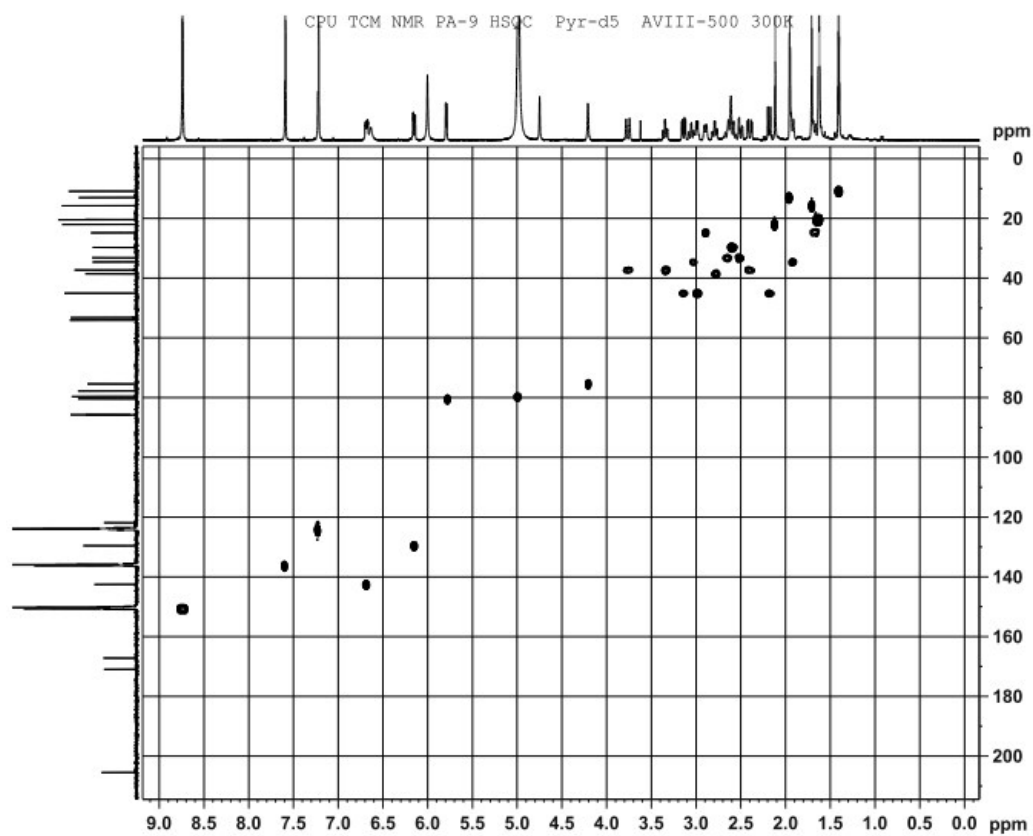

S28. HSQC spectrum of physagulide E (**5**) in pyridine-*d*<sub>5</sub>

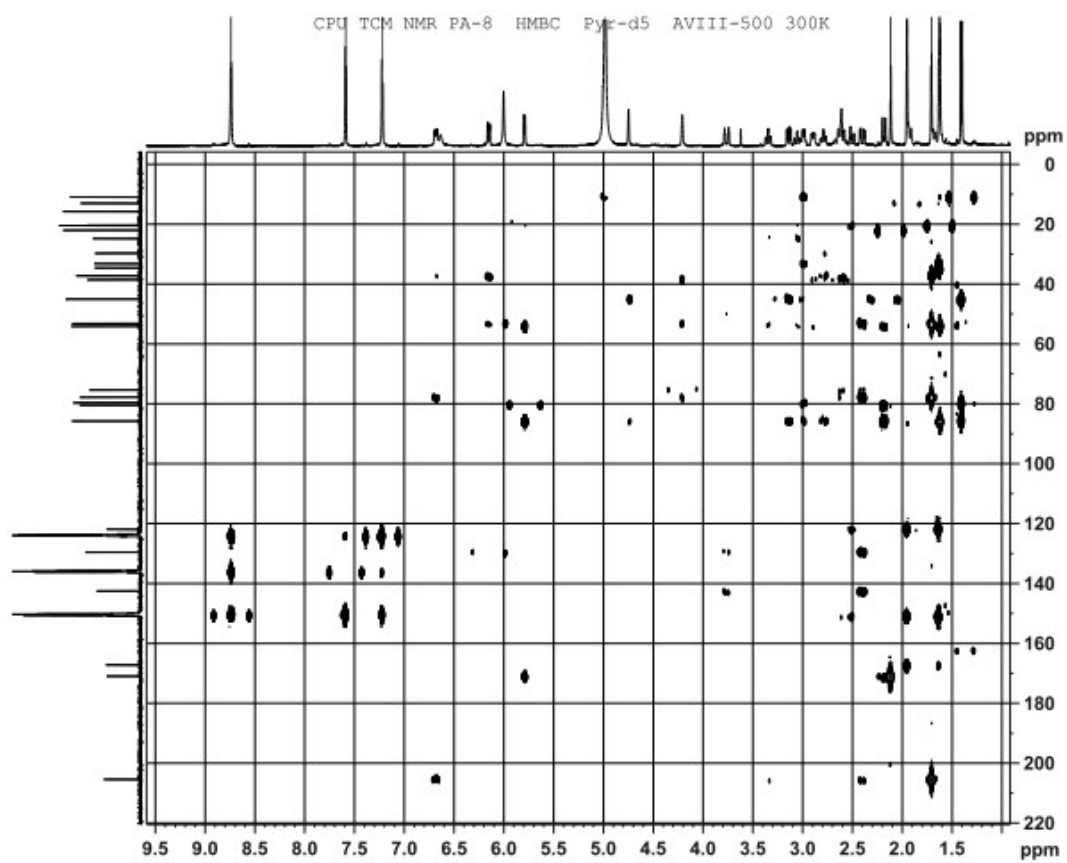

S29. HMBC spectrum of physagulide E (**5**) in pyridine- $d_5$



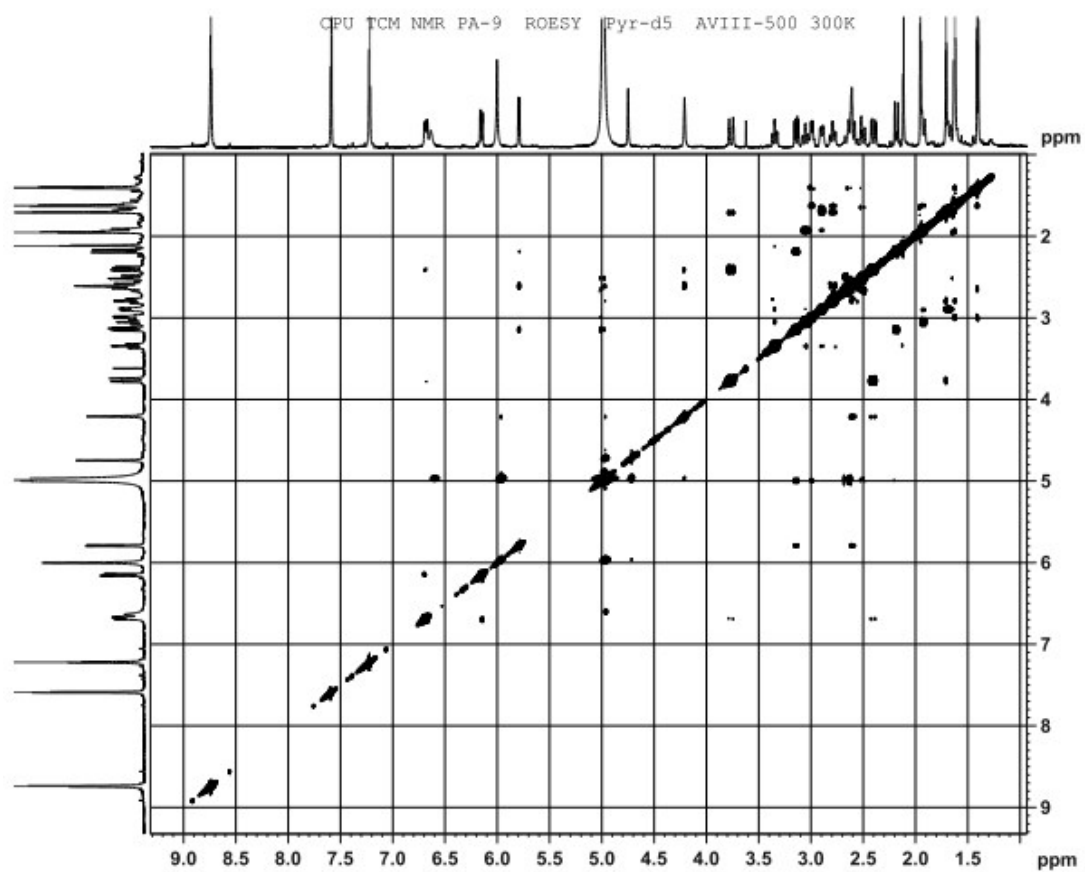

S30. ROESY spectrum of physagulide E (**5**) in pyridine- $d_5$

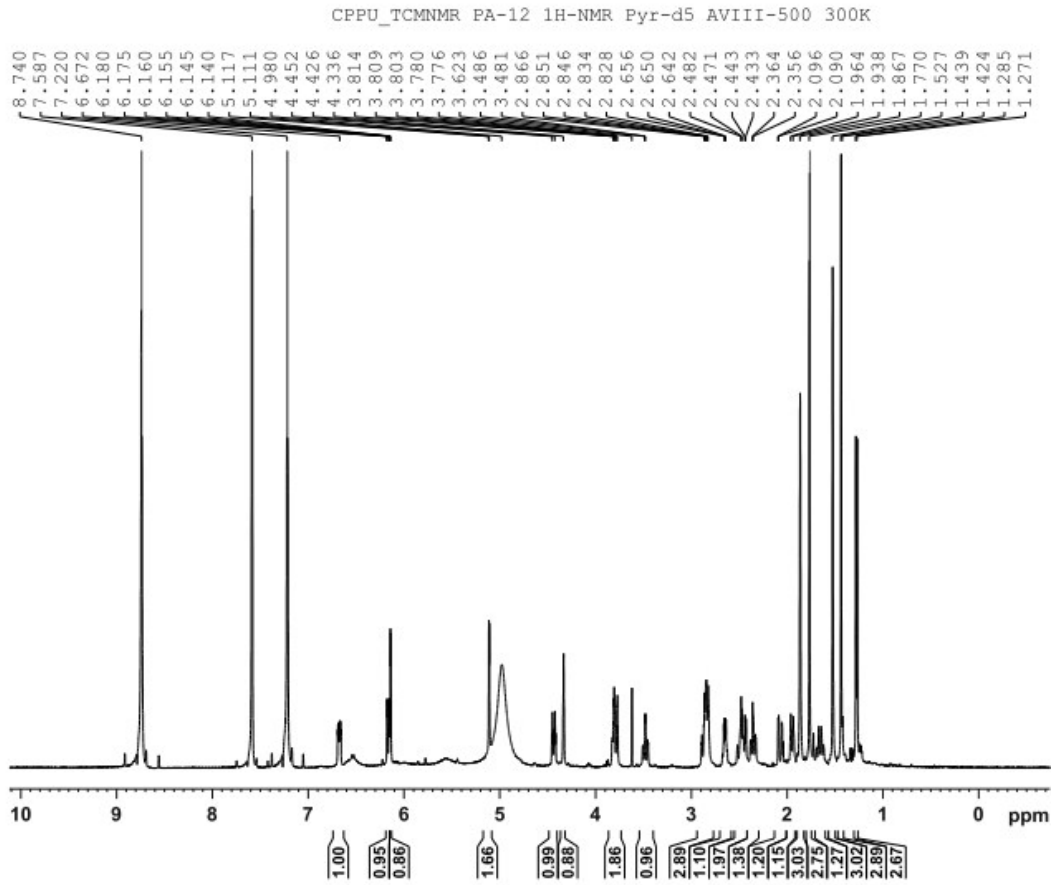

S31.  $^1\text{H}$  NMR spectrum of physagulide F (**6**) in pyridine- $d_5$  (500MHz)

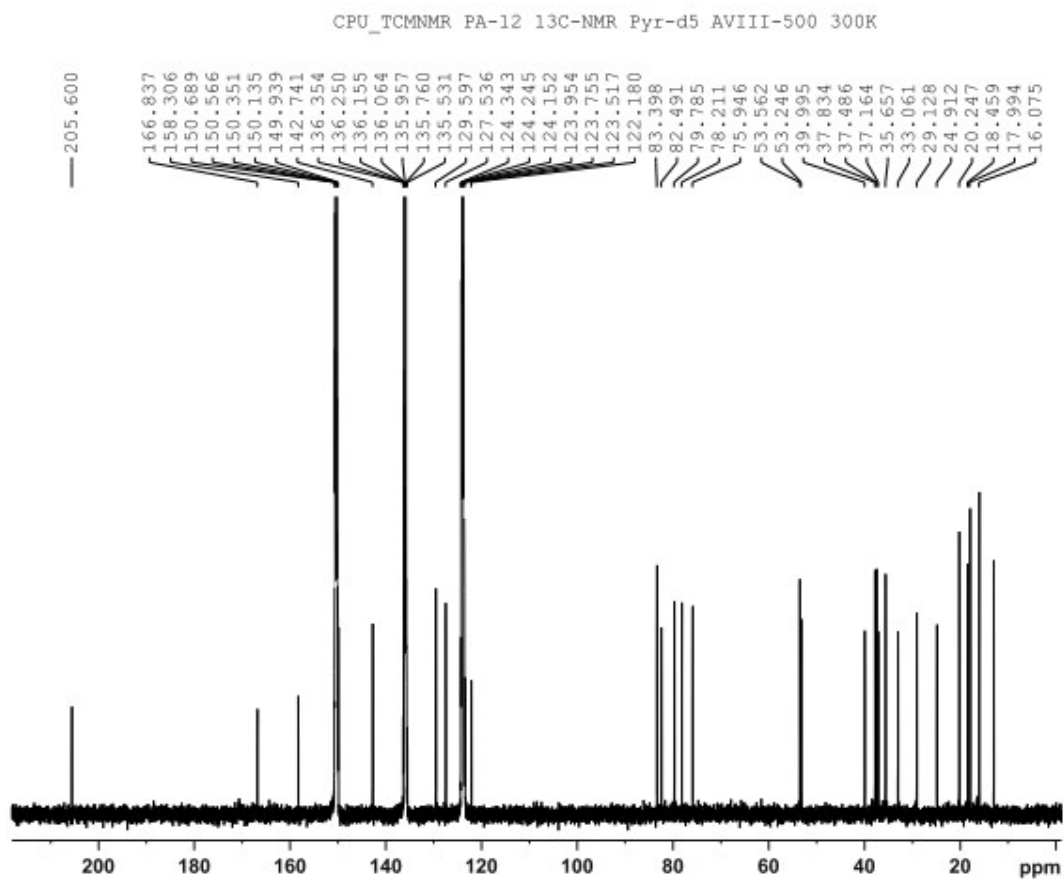

S32.  $^{13}\text{C}$  NMR spectrum of physagulide F (**6**) in pyridine- $d_5$  (125MHz)

# TCM-CPU HR-ESI-MS Display Report

Sample Name: PA-12

Instrument: Agilent 6520B Q-TOF

Acq. Date: 04/27 /2013

Operator: Administrator

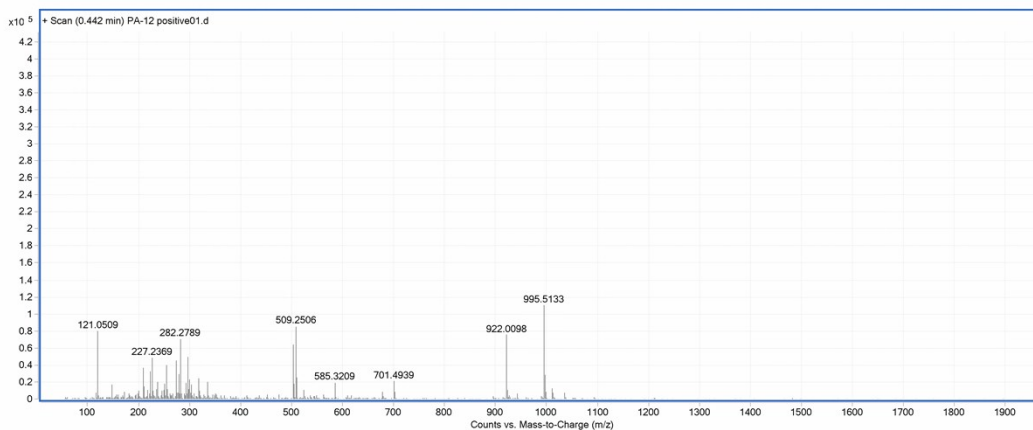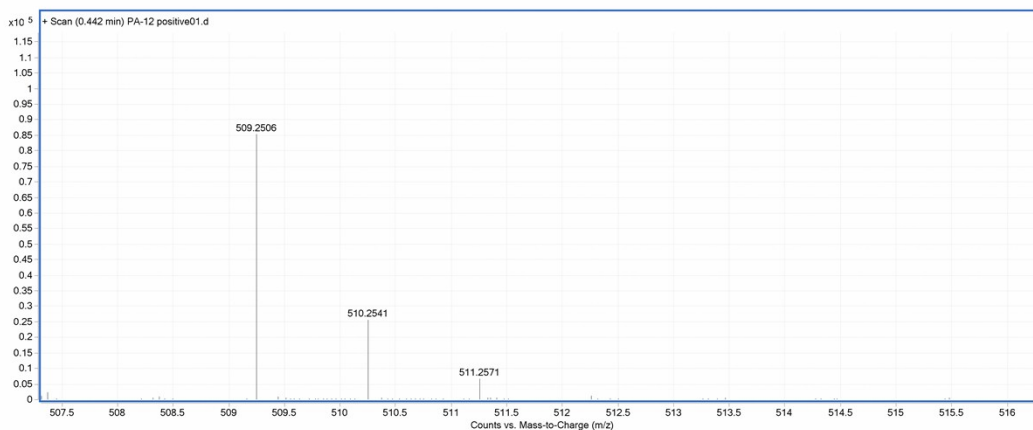

## Elemental Composition Calculator

|                                                  |                                                             |                     |                  |                 |                     |
|--------------------------------------------------|-------------------------------------------------------------|---------------------|------------------|-----------------|---------------------|
| <b>Target m/z:</b>                               | 509.2506                                                    | <b>Result type:</b> | Positive ions    | <b>Species:</b> | [M+Na] <sup>+</sup> |
| <b>Elements:</b>                                 | C (0-100); H (0-150); O (0-50); N(0-10); Na (0-5); S (0-5); |                     |                  |                 |                     |
| <b>Ion Formula</b>                               | <b>Calculated m/z</b>                                       |                     | <b>PPM Error</b> |                 |                     |
| C <sub>28</sub> H <sub>38</sub> NaO <sub>7</sub> | 509.2510                                                    |                     | 0.66             |                 |                     |

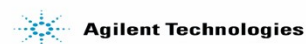

S33. HRESIMS spectrum of physagulide F (6)

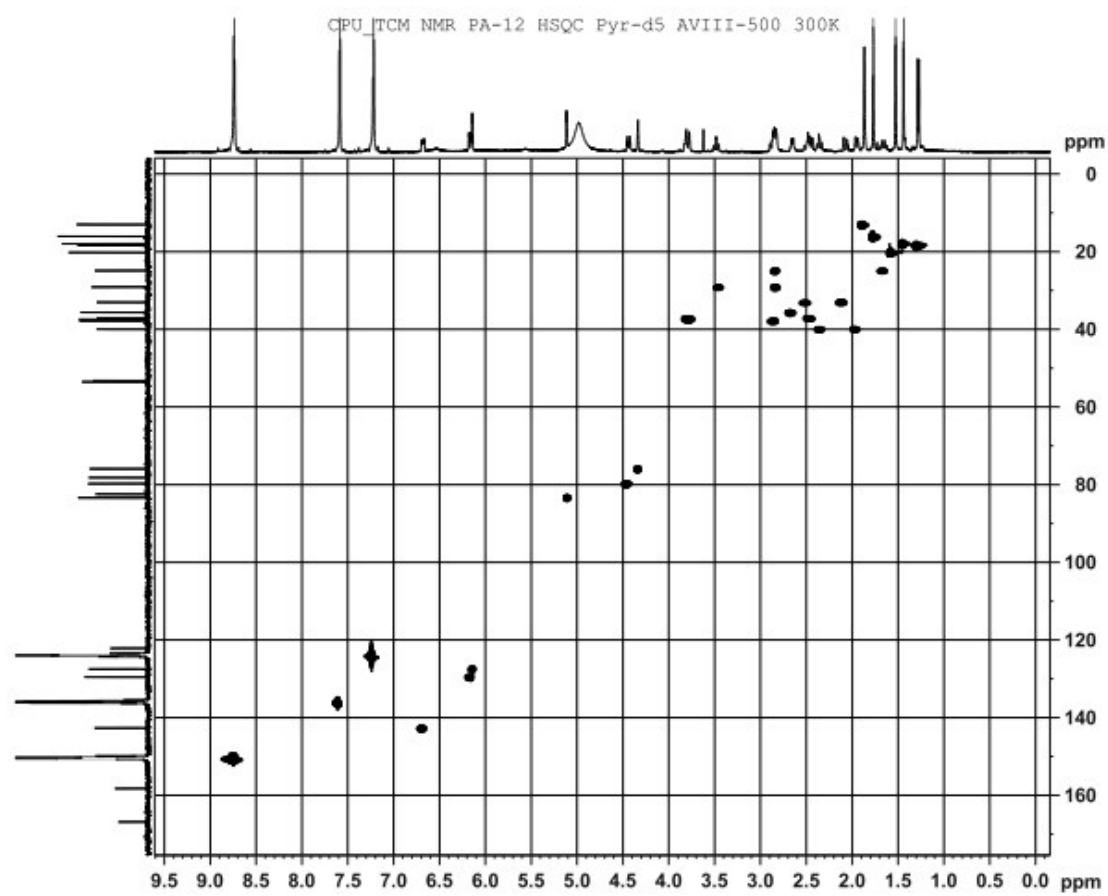

S34. HSQC spectrum of physagulide F (6) in pyridine- $d_5$

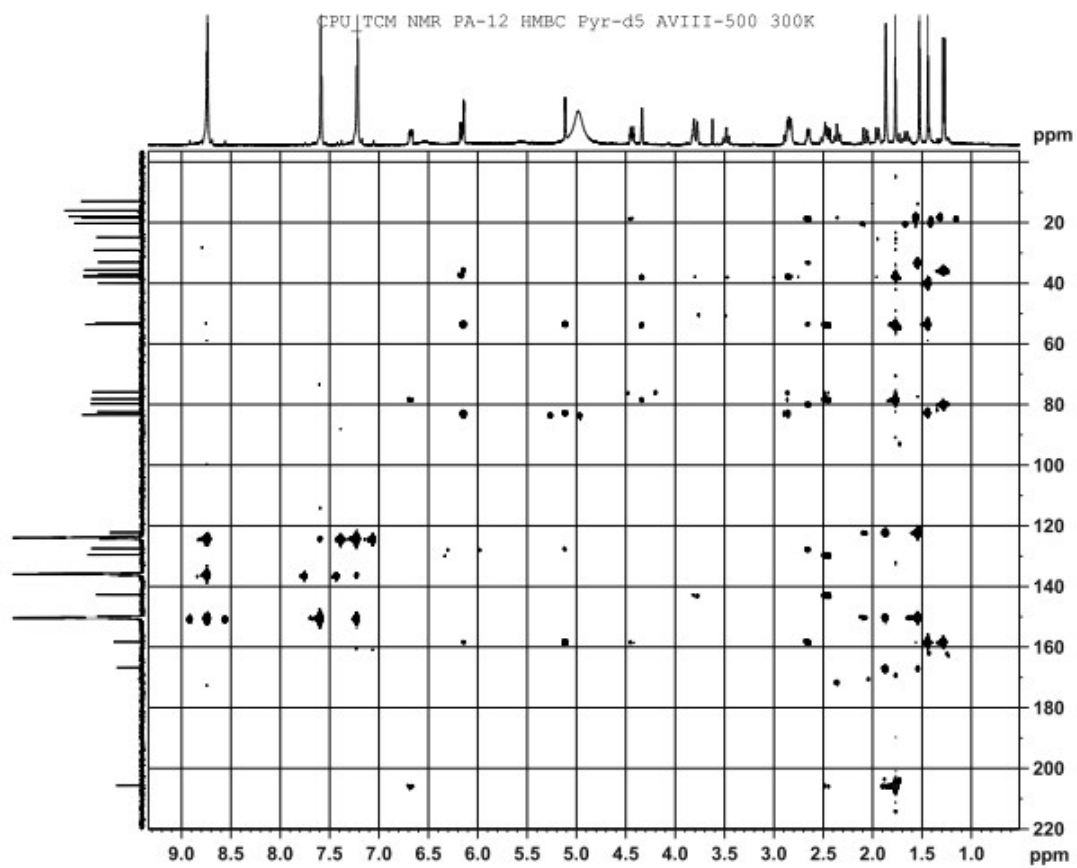

S35. HMBC spectrum of physagulide F (**6**) in pyridine- $d_5$

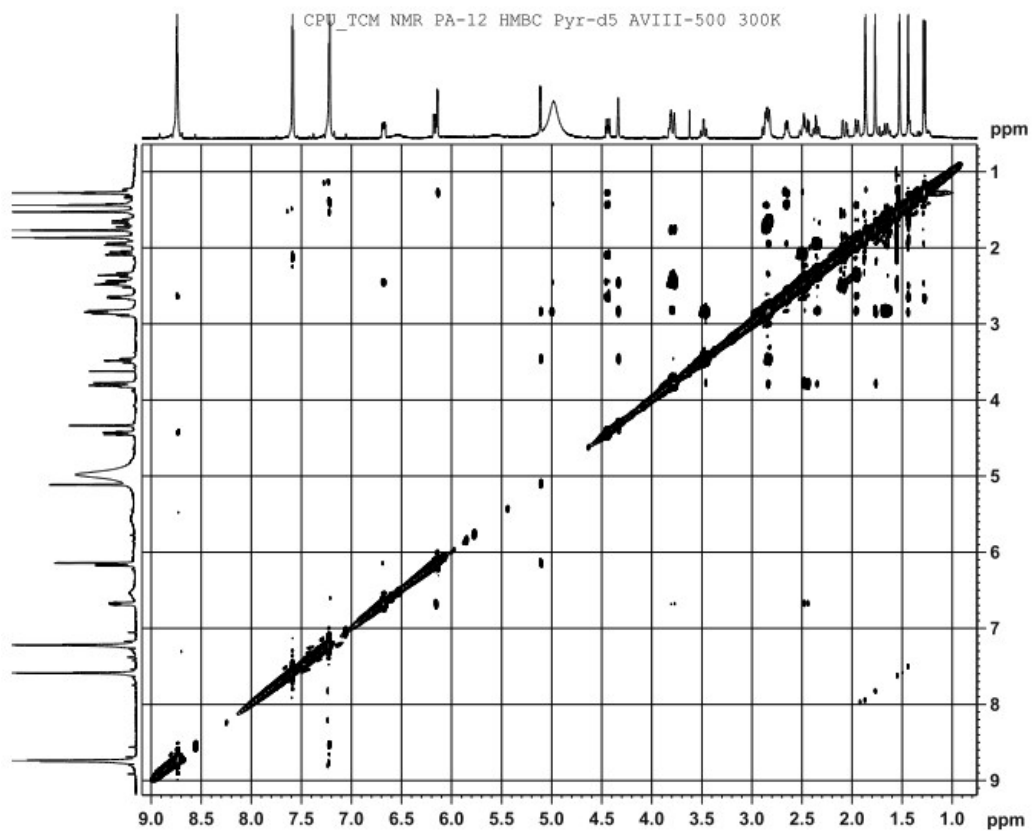

S36. ROESY spectrum of physagulide F (6) in pyridine- $d_5$







# TCM-CPU HR-ESI-MS Display Report

**Sample Name:** PA-13

**Instrument:** Agilent 6520B Q-TOF

**Acq. Date:** 04/27 /2013

**Operator:** Administrator

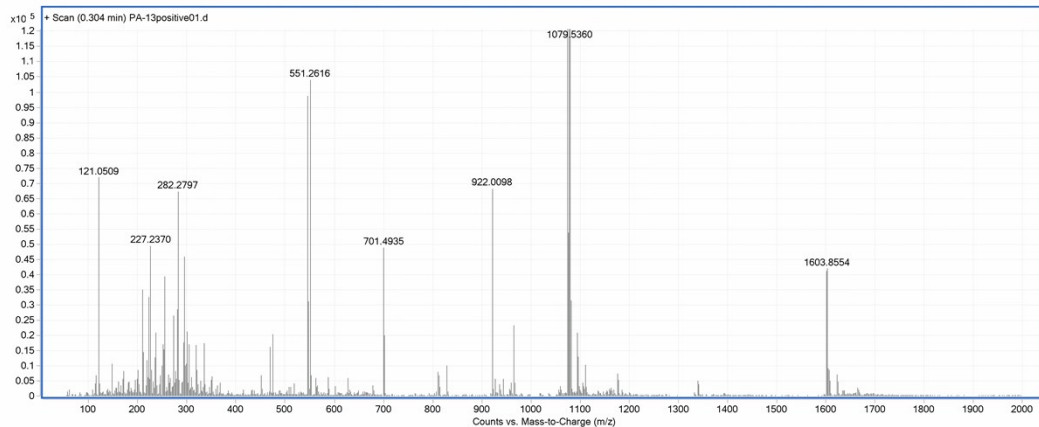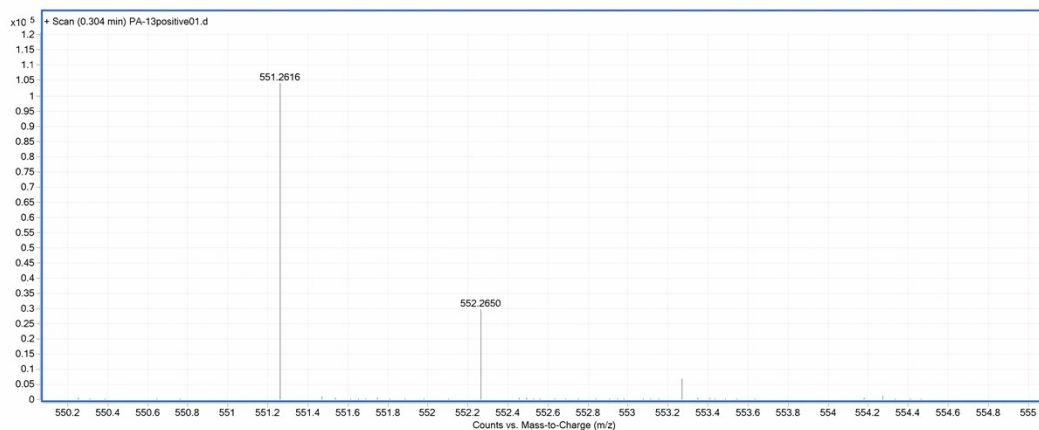

## Elemental Composition Calculator

|                    |                                                            |                     |                  |                 |                     |
|--------------------|------------------------------------------------------------|---------------------|------------------|-----------------|---------------------|
| <b>Target m/z:</b> | 551.2616                                                   | <b>Result type:</b> | Positive ions    | <b>Species:</b> | [M+Na] <sup>+</sup> |
| <b>Elements:</b>   | C (0-100); H (0-150); O (0-50); N(0-10); Na (0-5); S (0-5) |                     |                  |                 |                     |
| <b>Ion Formula</b> | <b>Calculated m/z</b>                                      |                     | <b>PPM Error</b> |                 |                     |
| C30H40NaO8         | 551.2615                                                   |                     | -0.17            |                 |                     |

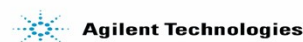

S39. HRESIMS spectrum of physagulide G (7)

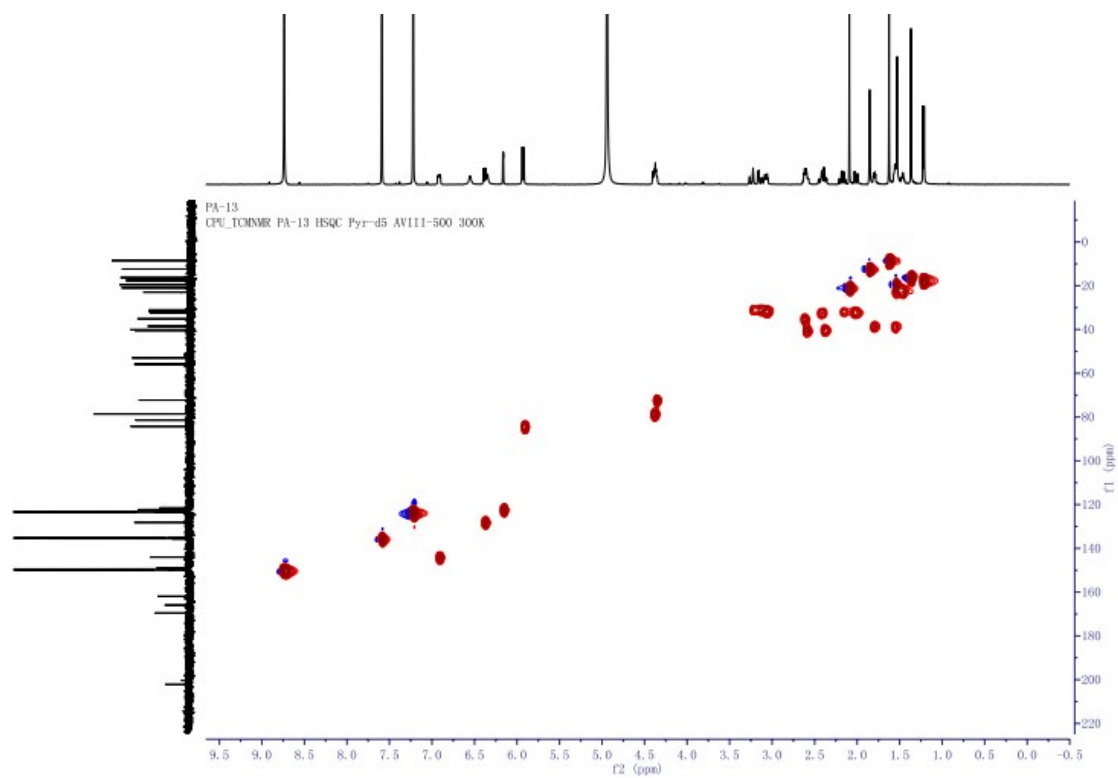

S40. HSQC spectrum of physagulide G (**7**) in pyridine- $d_5$

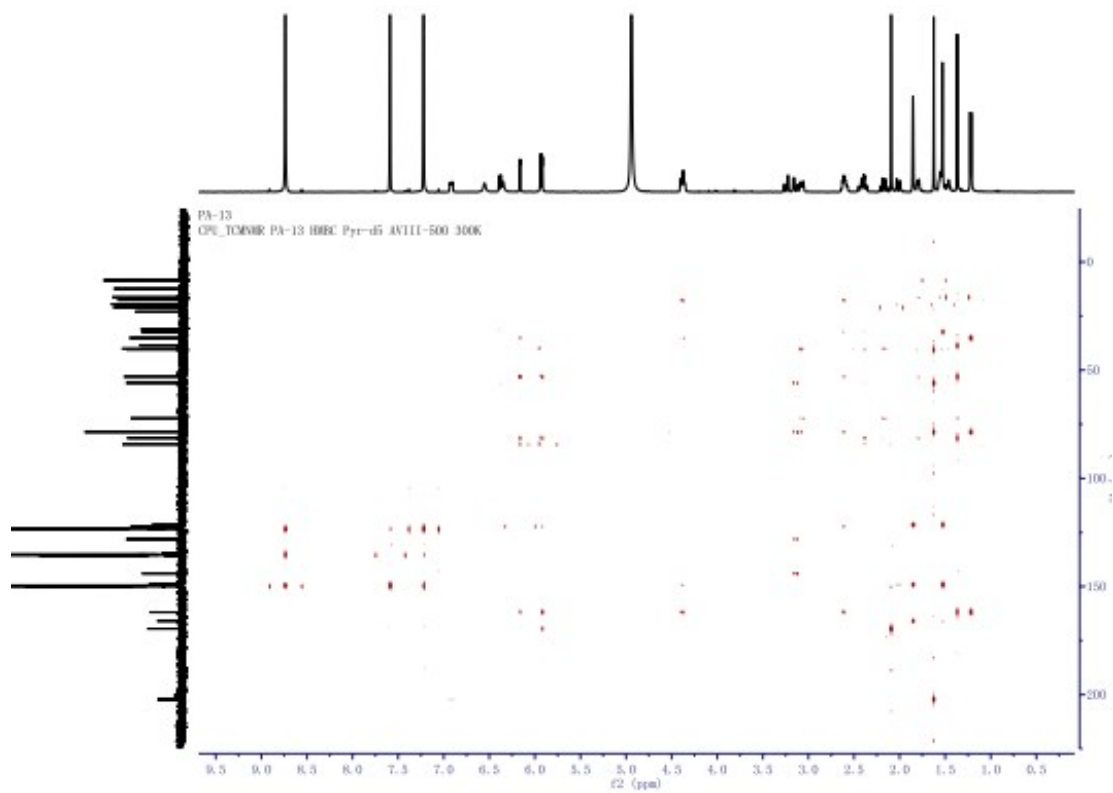

S41. HMBC spectrum of physagulide G (**7**) in pyridine- $d_5$

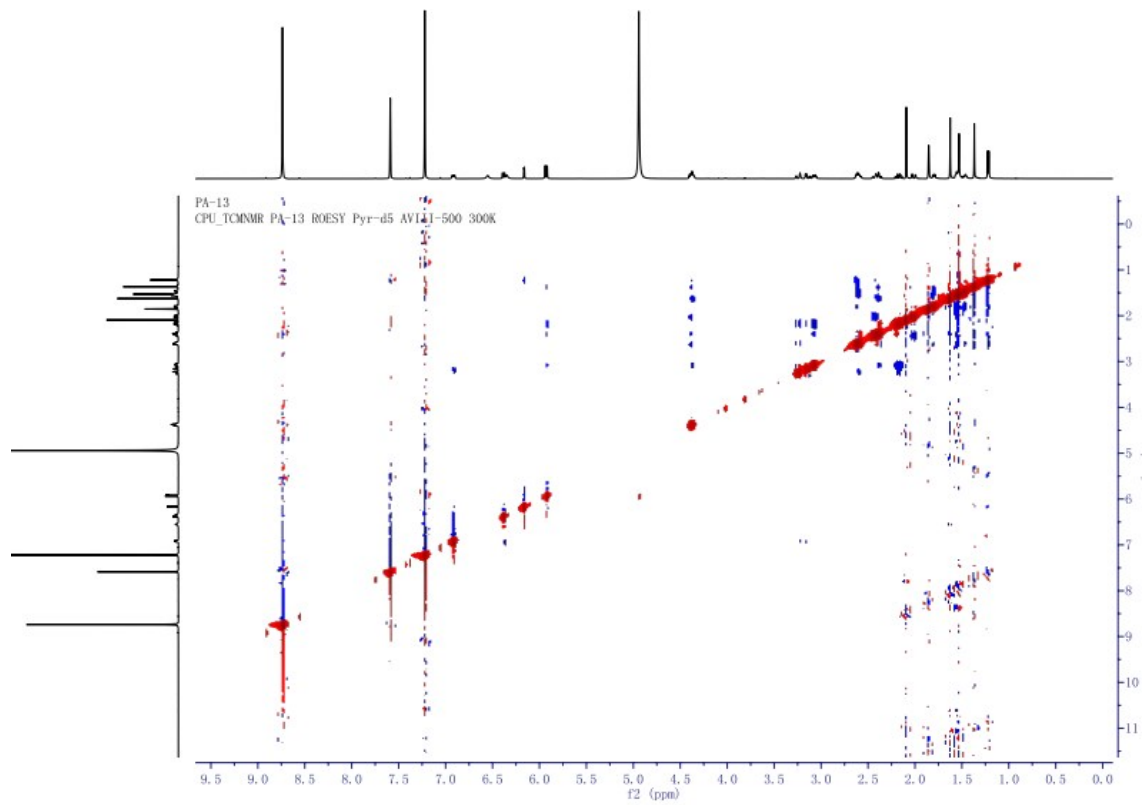

S42. ROESY spectrum of physagulide G (7) in pyridine- $d_5$



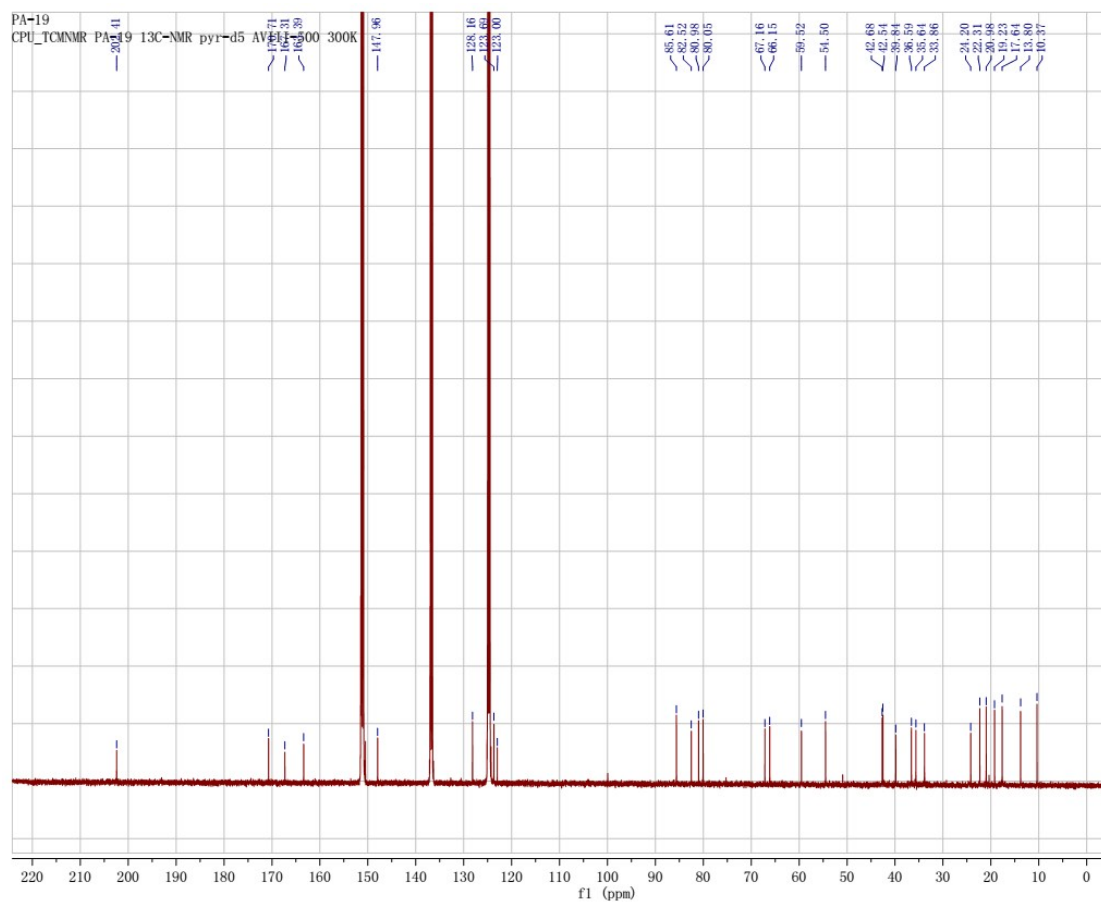

S44.  $^{13}\text{C}$  NMR spectrum physagulide H (**8**) in pyridine- $d_5$  (125MHz)

# TCM-CPU HR-ESI-MS Display Report

Sample Name: PA-19

Instrument: Agilent 6520B Q-TOF

Acq. Date: 04/27 /2013

Operator: Administrator

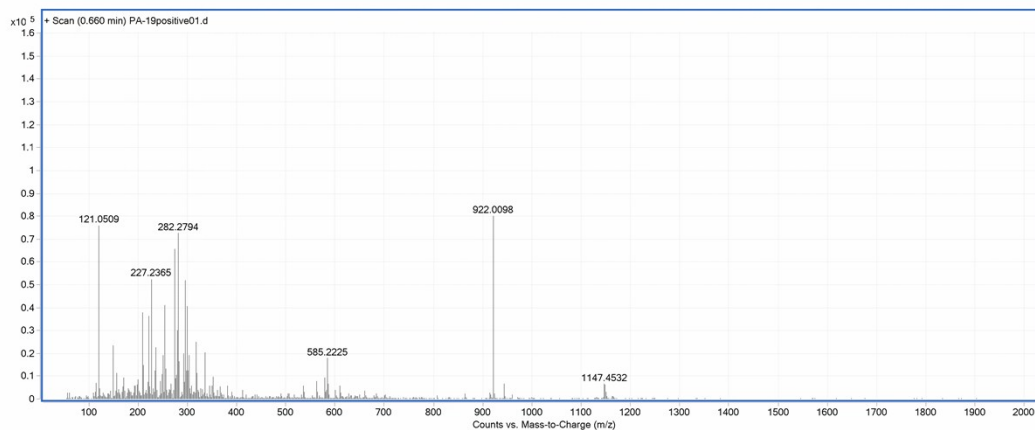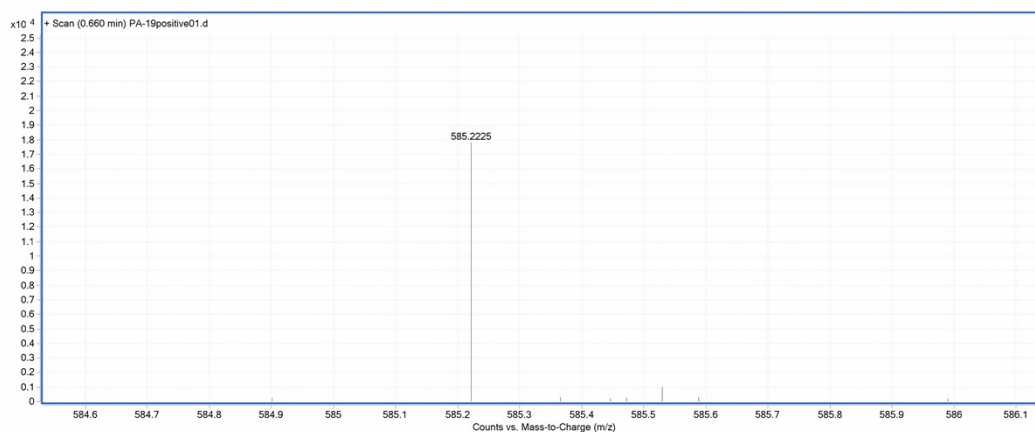

## Elemental Composition Calculator

|                    |                                                                     |                     |                  |                 |                     |
|--------------------|---------------------------------------------------------------------|---------------------|------------------|-----------------|---------------------|
| <b>Target m/z:</b> | 585.2225                                                            | <b>Result type:</b> | Positive ions    | <b>Species:</b> | [M+Na] <sup>+</sup> |
| <b>Elements:</b>   | C (0-100); H (0-150); O (0-50); N(0-10); Na (0-5); S (0-5); Cl(0-5) |                     |                  |                 |                     |
| <b>Ion Formula</b> | <b>Calculated m/z</b>                                               |                     | <b>PPM Error</b> |                 |                     |
| C30H39ClNaO8       | 585.2226                                                            |                     | 0.15             |                 |                     |

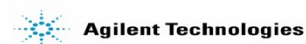

S45. HRESIMS spectrum of physagulide H (8)



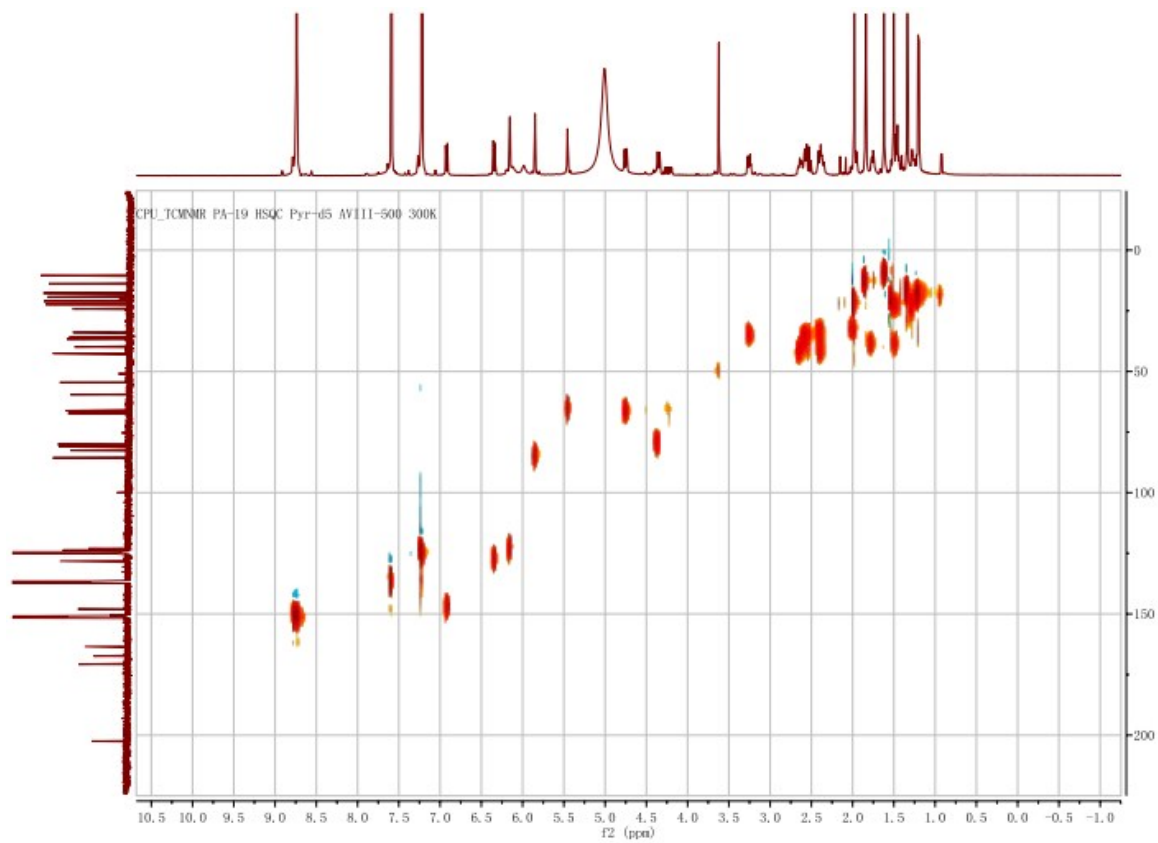

S46. HSQC spectrum of physagulide H (**8**) in pyridine- $d_5$

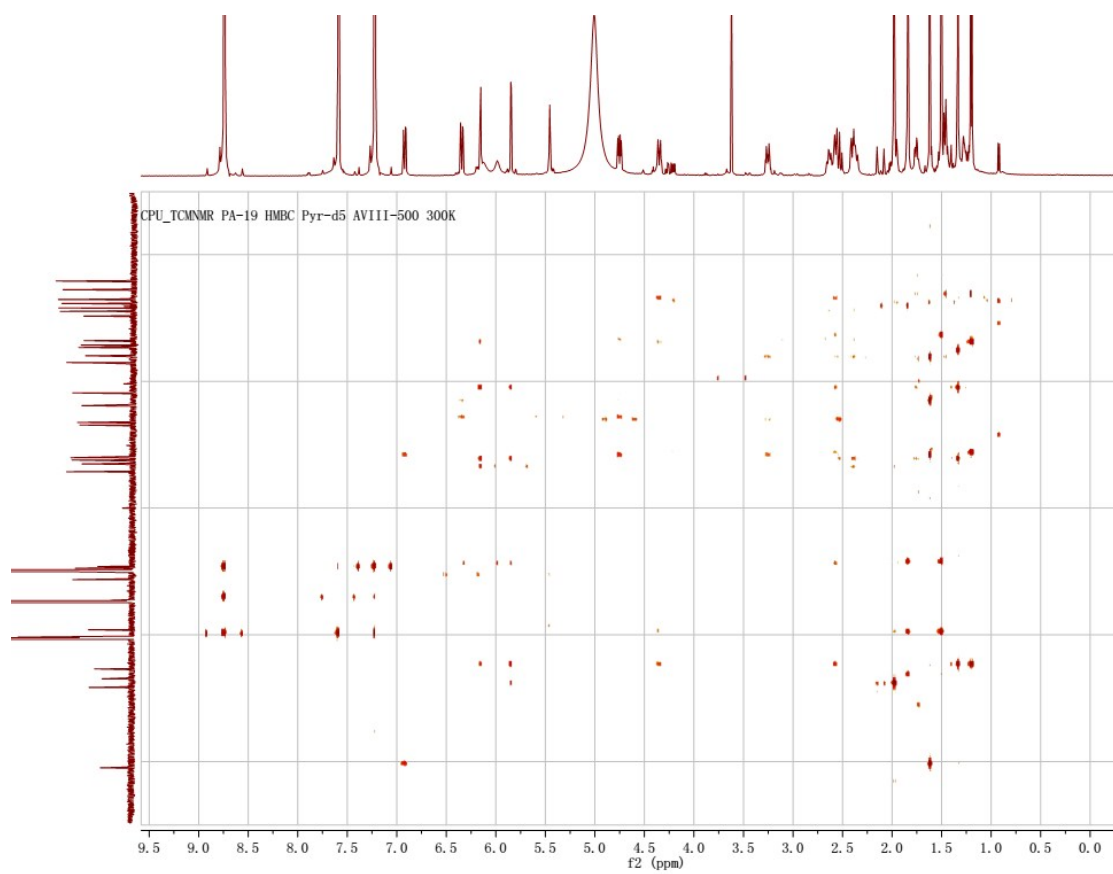

S47. HMBC spectrum of physagulide H (**8**) in pyridine- $d_5$

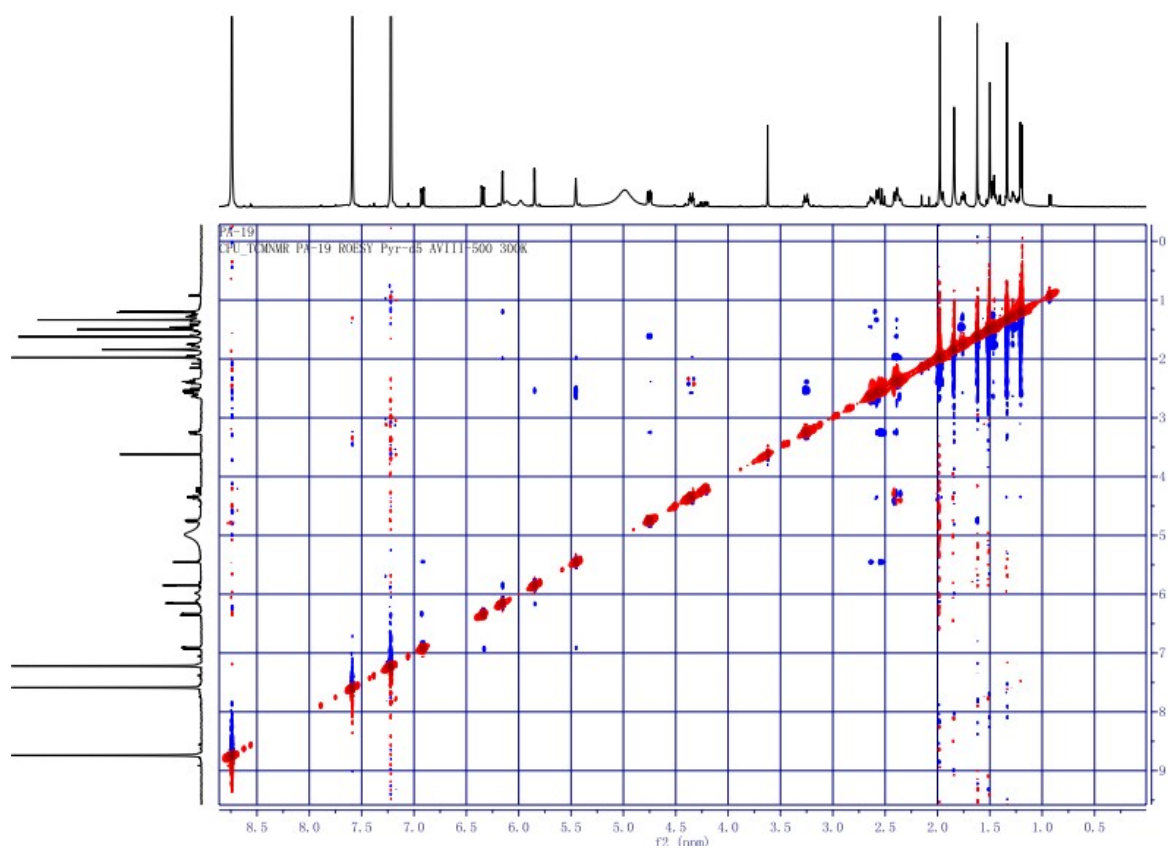

S48. ROESY spectrum of physagulide H (**8**) in pyridine- $d_5$
